# Supplementary material for: New cadinane sesquiterpenoids from the basidiomycetous fungus Pholiota sp.
Source: Royal Society of Chemistry journal article supplement (doi:10.1039/c6ra22448b), 2016-01-01

## New Cadinane Sesquiterpenoids from the Basidiomycetous Fungus

### *Pholiota* sp.

Jie Lin,<sup>a</sup> Renlei Wang,<sup>a</sup> Guohua Xu,<sup>a</sup> Zhengfeng Ding,<sup>a</sup> Xueshen Zhu,<sup>a</sup> Xingzhong Liu,<sup>b</sup> Jian Zou,<sup>c</sup> Guodong Chen,<sup>c</sup> Li Li<sup>d</sup> and Ling Liu<sup>\*b</sup>

*Jiangsu Key Laboratory for Biofunctional Molecules, College of Life Science and Chemistry, Jiangsu Second Normal University, Nanjing 210013, People's Republic of China; State Key Laboratory of Mycology, Institute of Microbiology, Chinese Academy of Sciences, Beijing 100101, People's Republic of China; Institute of Traditional Chinese Medicine & Natural Products, College of Pharmacy, Jinan University, Guangzhou 510632, P. R. China; Institute of Materia Medica, Chinese Academy of Medical Sciences & Peking Union Medical College, Beijing 100050, P. R. China*

| Contents                                                                                                                                | Page |
|-----------------------------------------------------------------------------------------------------------------------------------------|------|
| 1) <b>Figure S1.</b> <sup>1</sup> H NMR spectrum of pholiotin A ( <b>1</b> ; 500 MHz, acetone- <i>d</i> <sub>6</sub> )                  | 3    |
| 2) <b>Figure S2.</b> <sup>13</sup> C NMR spectrum of pholiotin A ( <b>1</b> ; 125 MHz, acetone- <i>d</i> <sub>6</sub> )                 | 4    |
| 3) <b>Figure S3.</b> <sup>1</sup> H- <sup>1</sup> H COSY spectrum of pholiotin A ( <b>1</b> ; 500 MHz, acetone- <i>d</i> <sub>6</sub> ) | 5    |
| 4) <b>Figure S4.</b> HSQC spectrum of pholiotin A ( <b>1</b> ; 500 MHz, acetone- <i>d</i> <sub>6</sub> )                                | 6    |
| 5) <b>Figure S5.</b> HMBC spectrum of pholiotin A ( <b>1</b> ; 500 MHz, acetone- <i>d</i> <sub>6</sub> )                                | 7    |
| 6) <b>Figure S6.</b> <sup>1</sup> H NMR spectrum of pholiotin B ( <b>2</b> ; 500 MHz, acetone- <i>d</i> <sub>6</sub> )                  | 8    |
| 7) <b>Figure S7.</b> <sup>13</sup> C NMR spectrum of pholiotin B ( <b>2</b> ; 125 MHz, acetone- <i>d</i> <sub>6</sub> )                 | 9    |
| 8) <b>Figure S8.</b> HMBC spectrum of pholiotin B ( <b>2</b> ; 500 MHz, acetone- <i>d</i> <sub>6</sub> )                                | 10   |
| 9) <b>Figure S9.</b> <sup>1</sup> H NMR spectrum of pholiotin C ( <b>3</b> ; 500 MHz, acetone- <i>d</i> <sub>6</sub> )                  | 11   |
| 10) <b>Figure S10.</b> <sup>13</sup> C NMR spectrum of pholiotin C ( <b>3</b> ; 125 MHz, acetone- <i>d</i> <sub>6</sub> )               | 12   |
| 11) <b>Figure S11.</b> HMBC spectrum of pholiotin C ( <b>3</b> ; 500 MHz, acetone- <i>d</i> <sub>6</sub> )                              | 13   |
| 12) <b>Figure S12.</b> <sup>1</sup> H NMR spectrum of pholiotin D ( <b>4</b> ; 500 MHz, acetone- <i>d</i> <sub>6</sub> )                | 14   |
| 13) <b>Figure S13.</b> <sup>13</sup> C NMR spectrum of pholiotin D ( <b>4</b> ; 125 MHz, acetone- <i>d</i> <sub>6</sub> )               | 15   |
| 14) <b>Figure S14.</b> HSQC spectrum of pholiotin D ( <b>4</b> ; 500 MHz, acetone- <i>d</i> <sub>6</sub> )                              | 16   |
| 15) <b>Figure S15.</b> HMBC spectrum of pholiotin D ( <b>4</b> ; 500 MHz, CDCl <sub>3</sub> )                                           | 17   |
| 16) <b>Figure S16.</b> <sup>1</sup> H NMR spectrum of pholiotin E ( <b>5</b> ; 500 MHz, acetone- <i>d</i> <sub>6</sub> )                | 18   |
| 17) <b>Figure S17.</b> <sup>13</sup> C NMR spectrum of pholiotin E ( <b>5</b> ; 125 MHz, acetone- <i>d</i> <sub>6</sub> )               | 19   |
| 18) <b>Figure S18.</b> HMBC spectrum of pholiotin E ( <b>5</b> ; 500 MHz, acetone- <i>d</i> <sub>6</sub> )                              | 20   |
| 19) <b>Figure S19.</b> <sup>1</sup> H NMR spectrum of <i>R</i> -MTPA ester derivative                                                   |      |

|                                                                        |    |
|------------------------------------------------------------------------|----|
| (1a ; 500 MHz, CD <sub>3</sub> OD)                                     | 21 |
| 20) <b>Figure S20.</b> CD spectrum of pholiotin A ( <b>1</b> ) in MeOH | 22 |
| 21) <b>Figure S21.</b> CD spectrum of pholiotin B ( <b>2</b> ) in MeOH | 23 |
| 22) <b>Figure S22.</b> CD spectrum of pholiotin C ( <b>3</b> ) in MeOH | 24 |
| 23) <b>Figure S23.</b> CD spectrum of pholiotin D ( <b>4</b> ) in MeOH | 25 |
| 24) <b>Figure S24.</b> CD spectrum of pholiotin E ( <b>5</b> ) in MeOH | 26 |
| 25) <b>Figure S25.</b> The optimized conformers for <b>1c</b>          | 27 |
| 26) <b>Figure S26.</b> The optimized conformers for <b>5a</b>          | 28 |

---

\* To whom correspondence should be addressed. Tel.: +86 10 64806153. E-mail: liul@im.ac.cn

<sup>a</sup> Jiangsu Second Normal University.

<sup>b</sup> Institute of Microbiology.

<sup>c</sup> Jinan University.

<sup>d</sup> Institute of Materia Medica.

**Figure S1.**  $^1\text{H}$  NMR Spectrum of Pholiotin A (**1**; 500 MHz, Acetone- $d_6$ )

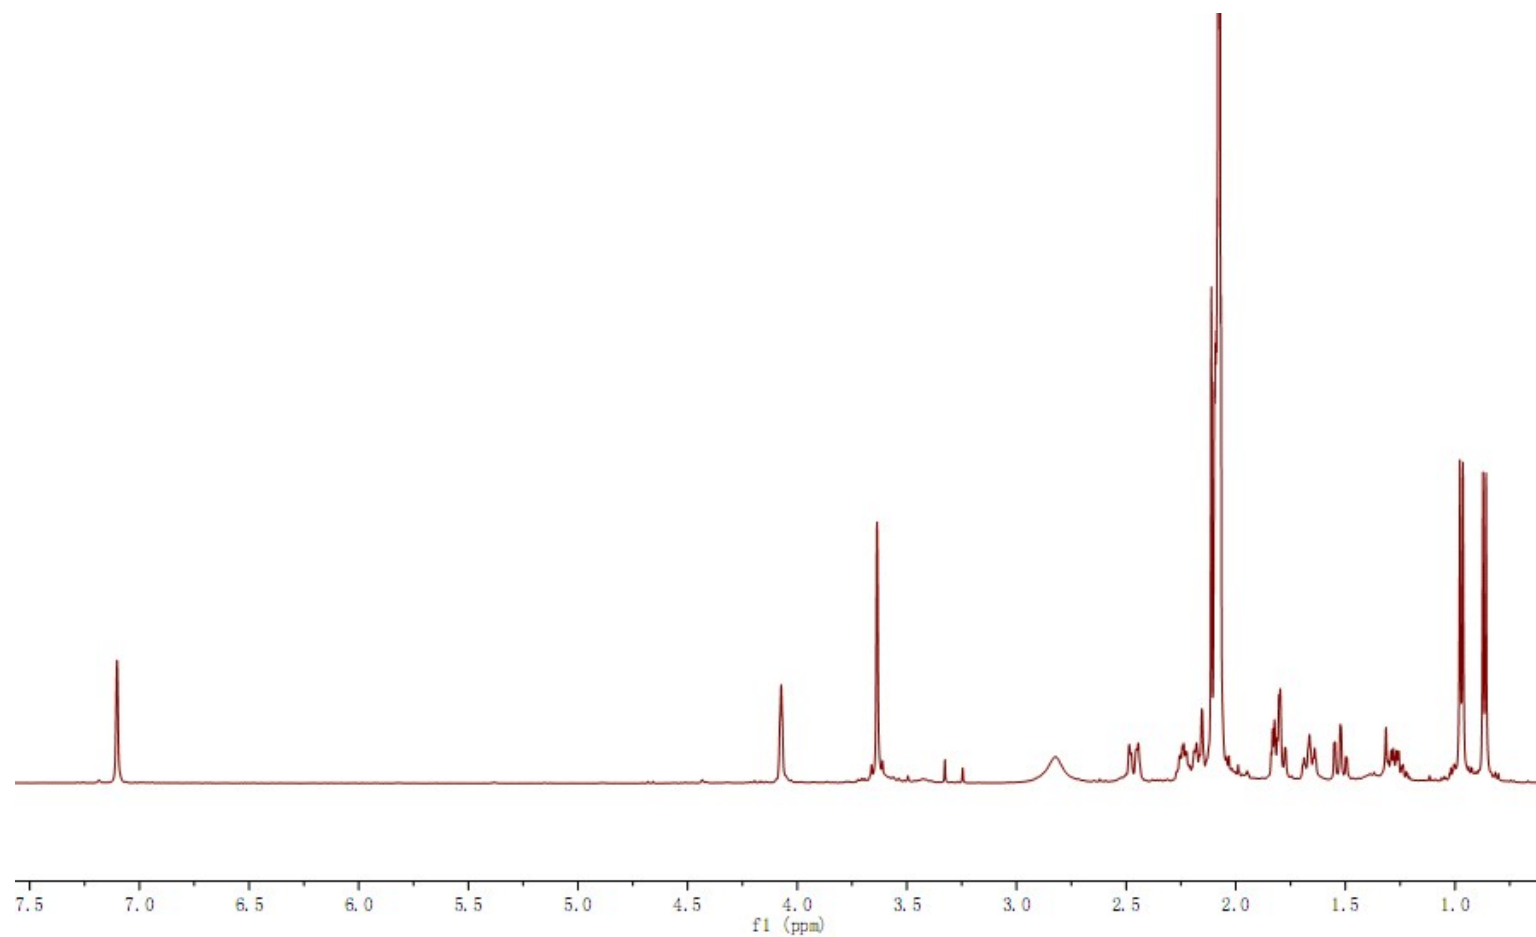

**Figure S2.**  $^{13}\text{C}$  NMR Spectrum of Pholiotin A (**1**; 125 MHz, Acetone- $d_6$ )

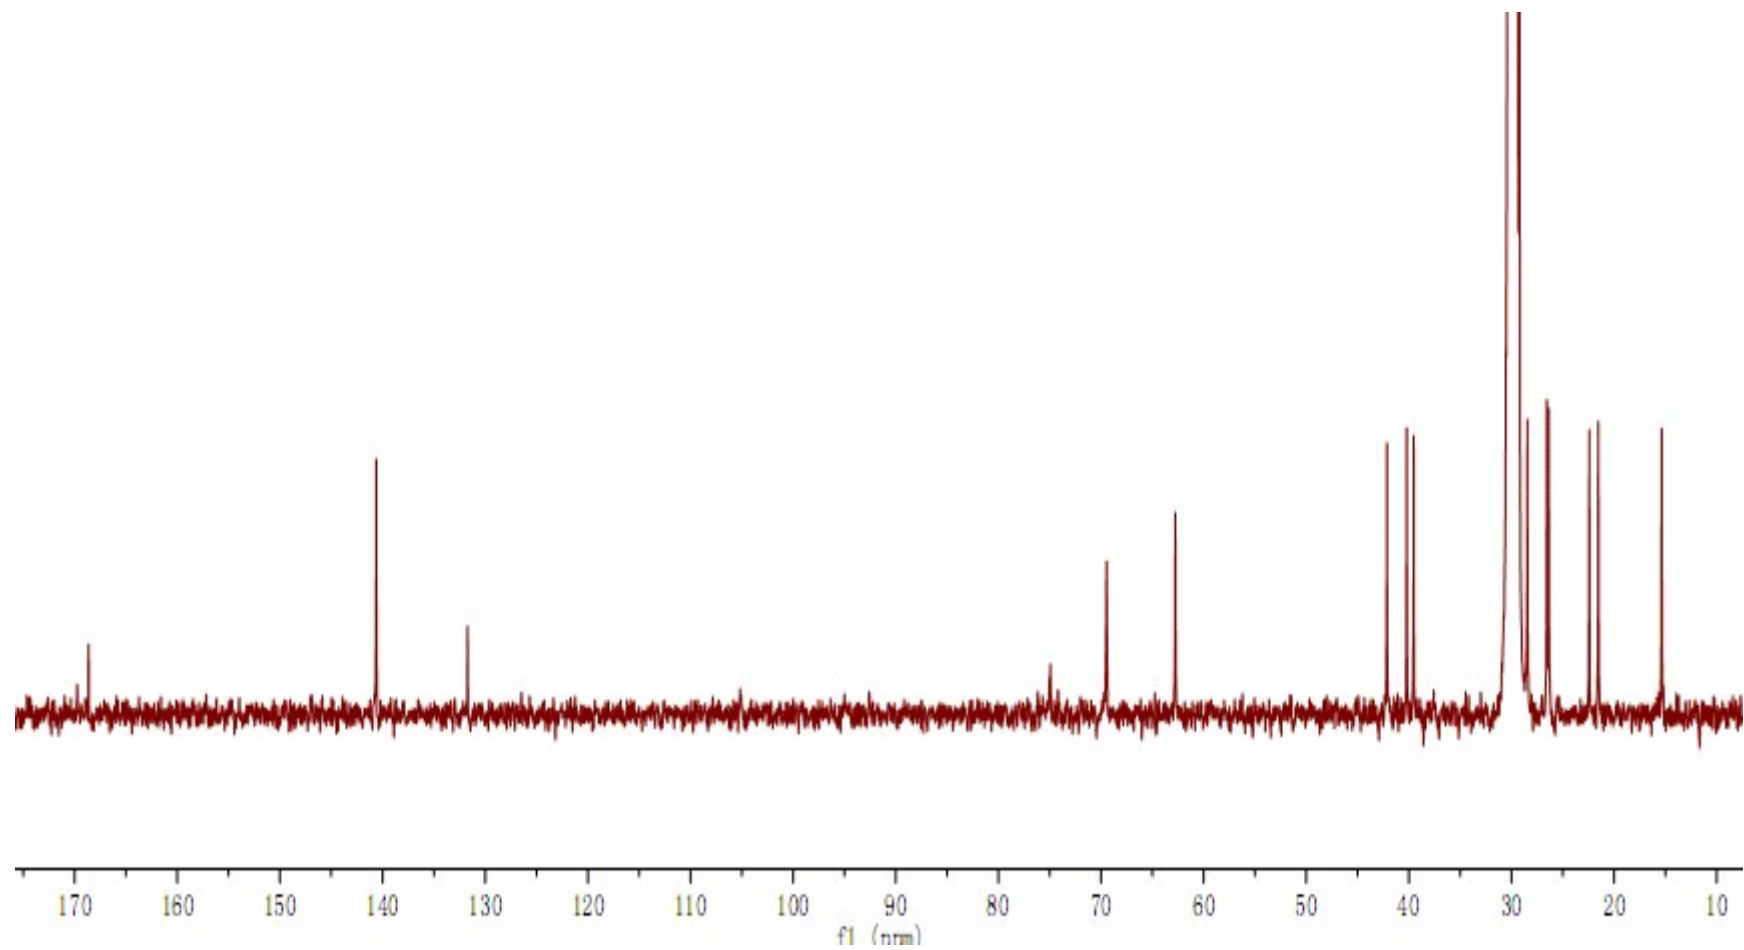

**Figure S3.**  $^1\text{H}$ - $^1\text{H}$  COSY Spectrum of Pholiotin A (**1**; 500 MHz, Acetone- $d_6$ )

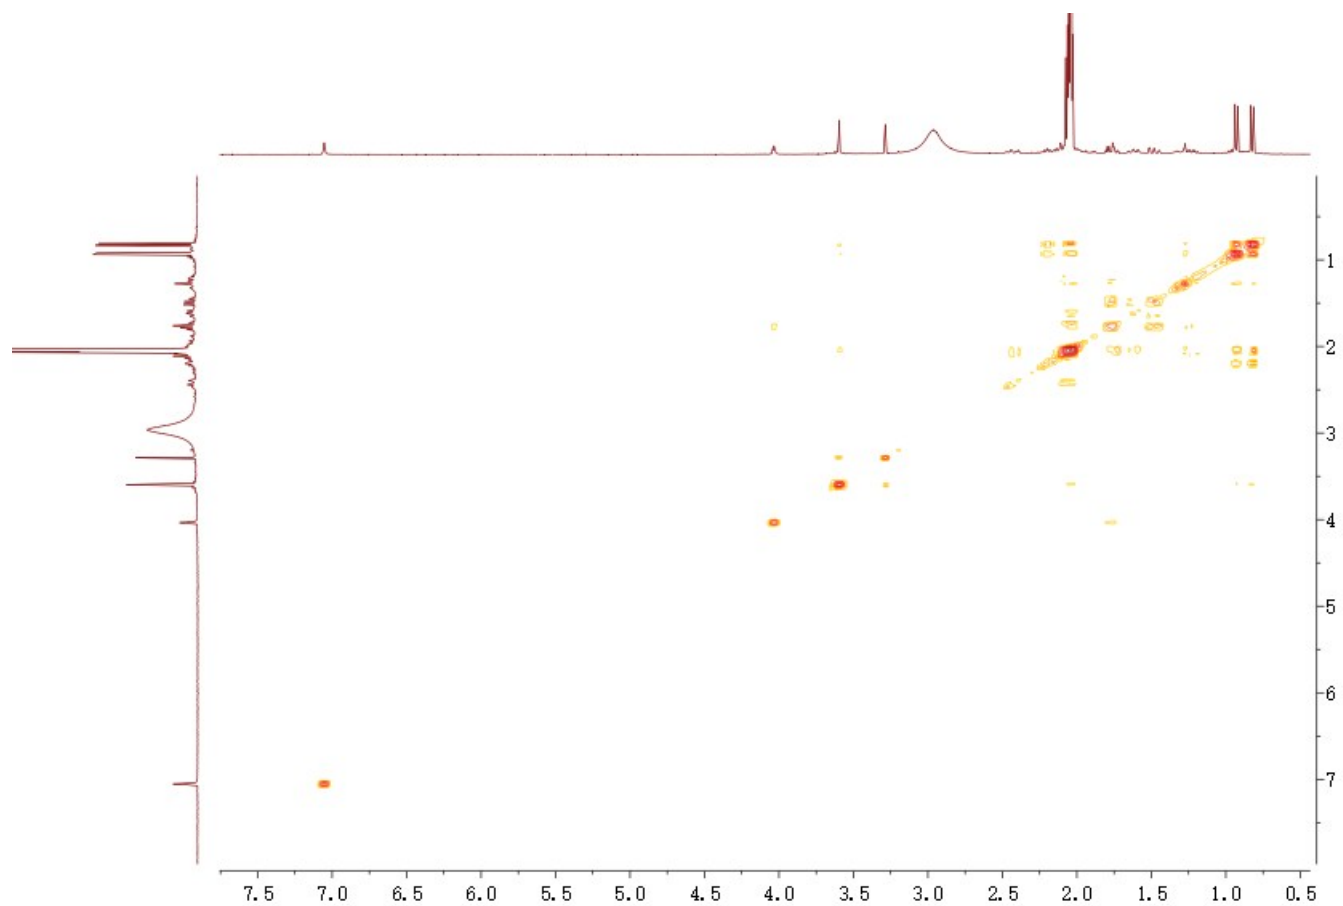

**Figure S4.** HSQC Spectrum of Pholiotin A (1; 500 MHz, Acetone- $d_6$ )

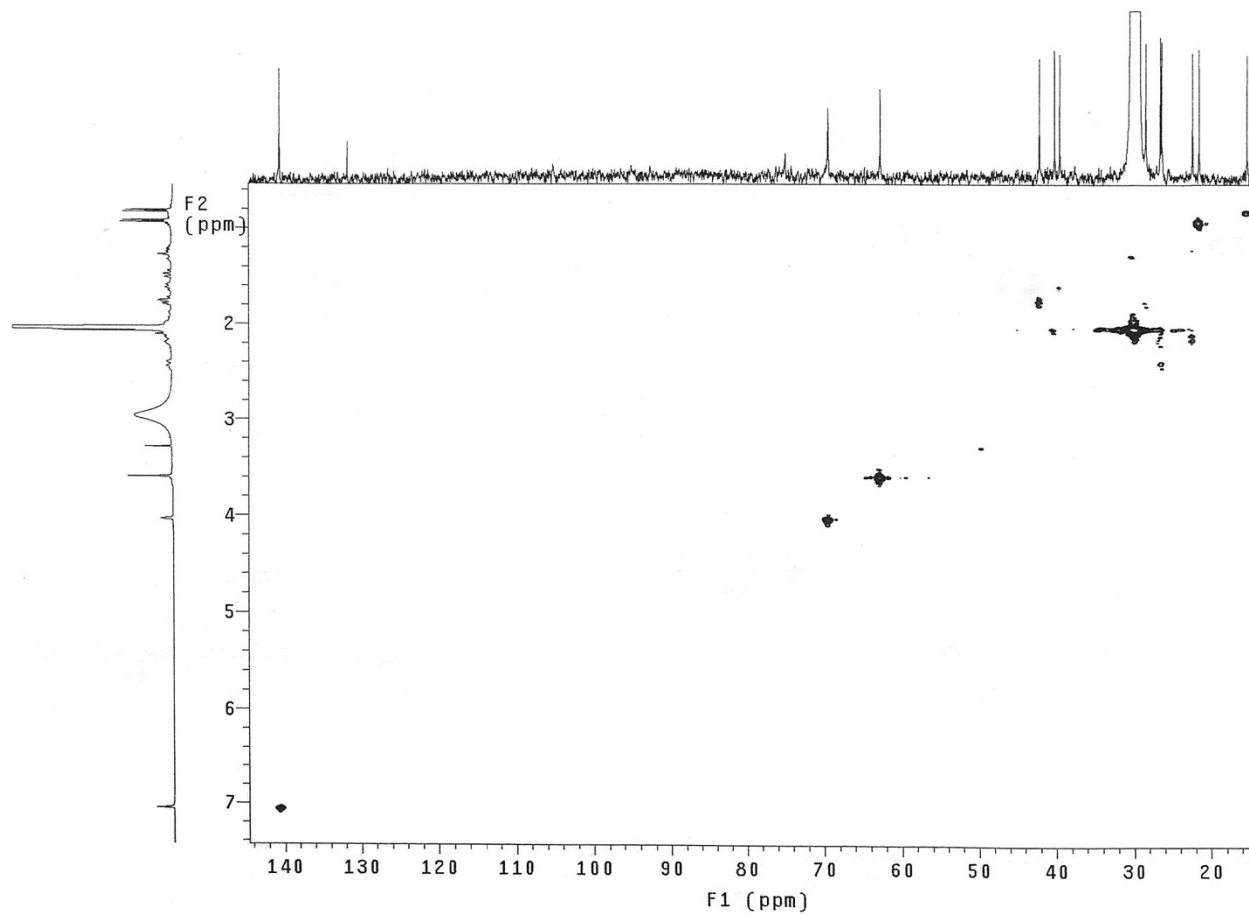

**Figure S5.** HMBC Spectrum of Pholiotin A (**1**; 500 MHz, Acetone- $d_6$ )

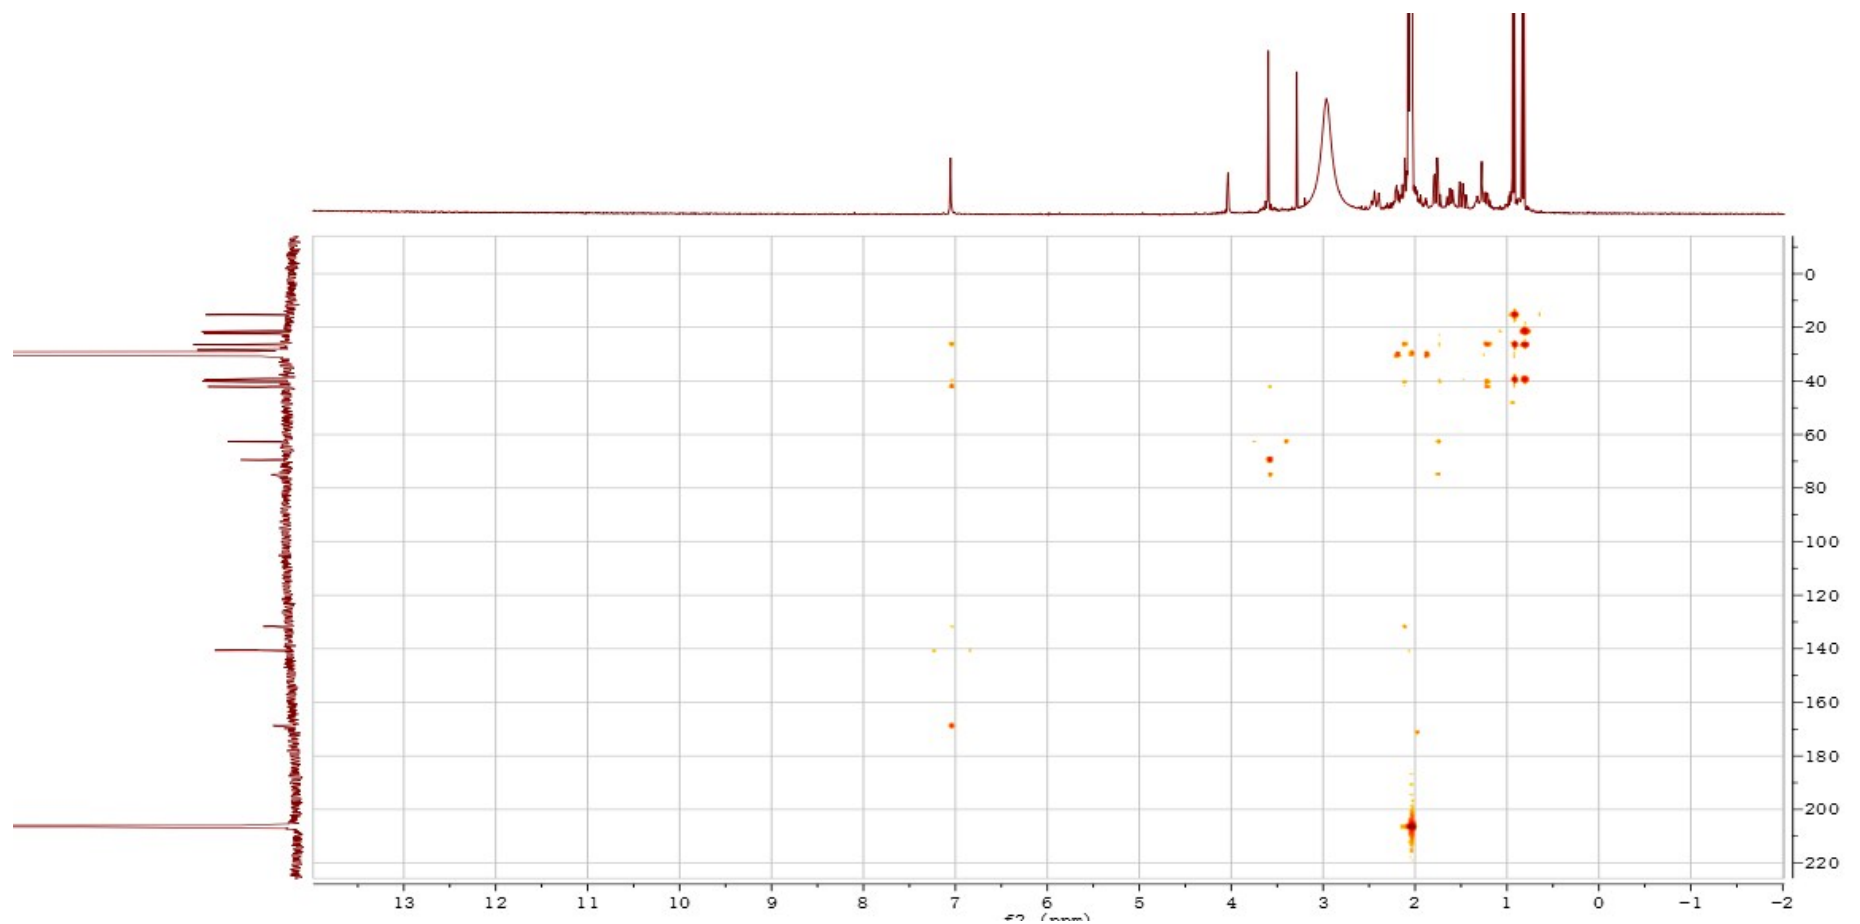

**Figure S6.**  $^1\text{H}$  NMR Spectrum of Pholiotin B (**2**; 500 MHz, Acetone- $d_6$ )

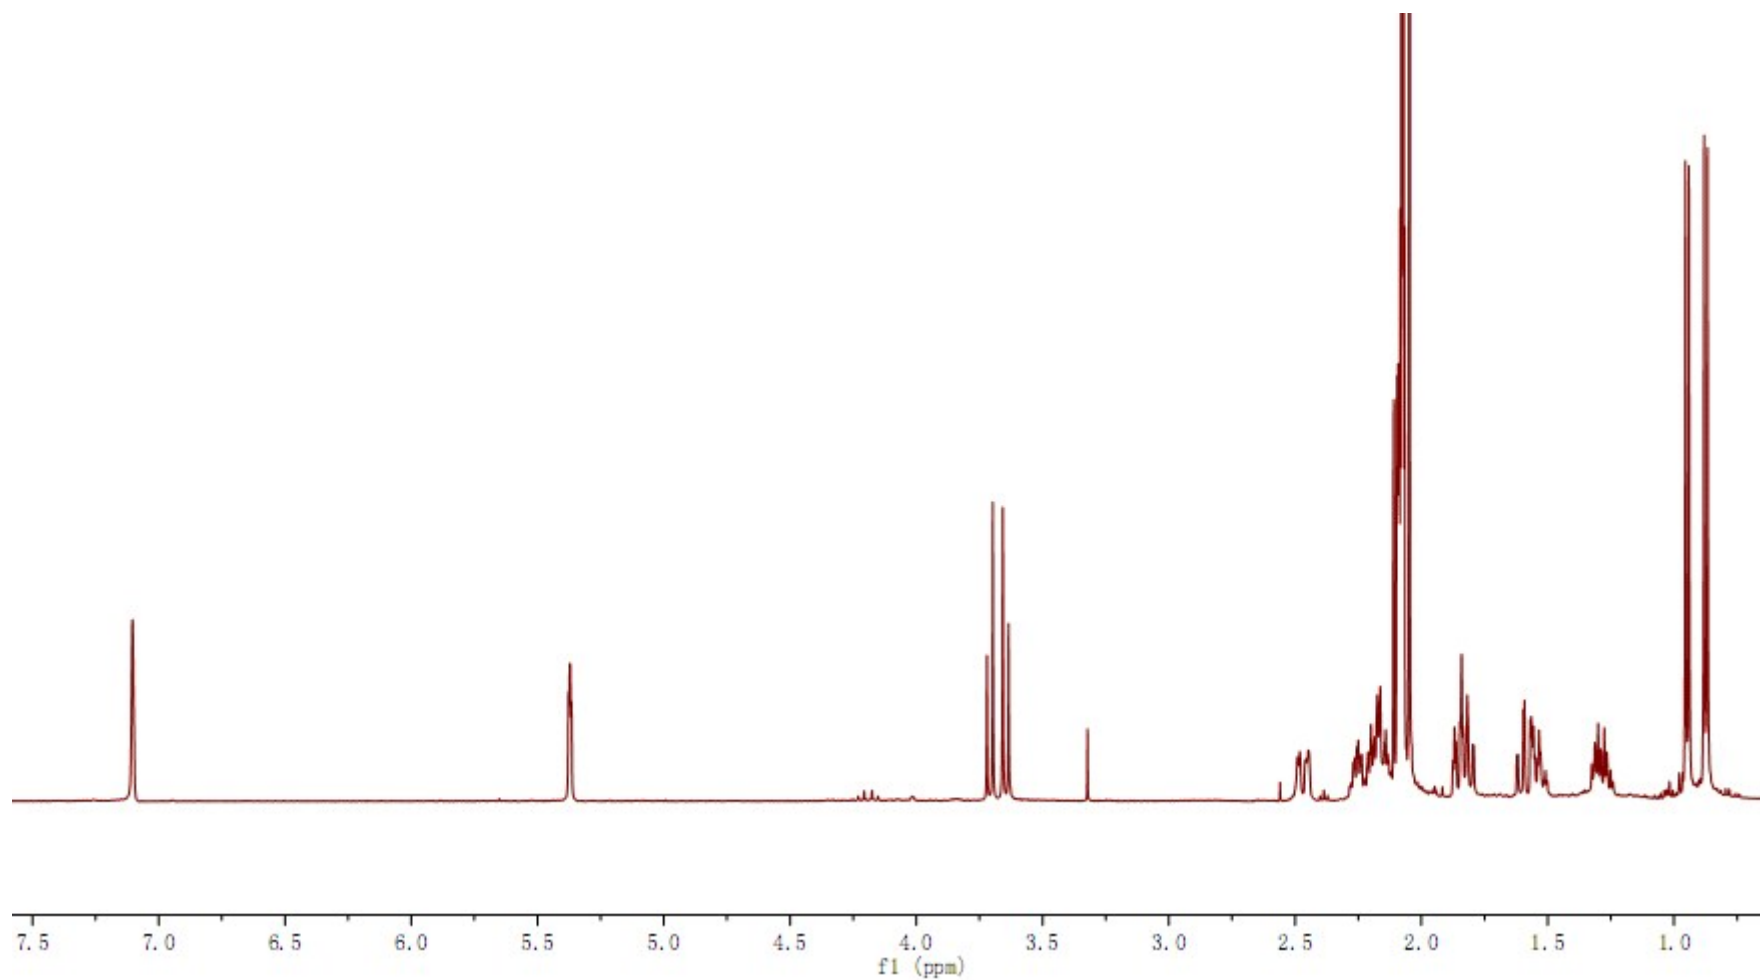



**Figure S7.**  $^{13}\text{C}$  NMR Spectrum of Pholiotin B (**2**; 125 MHz, Acetone- $d_6$ )

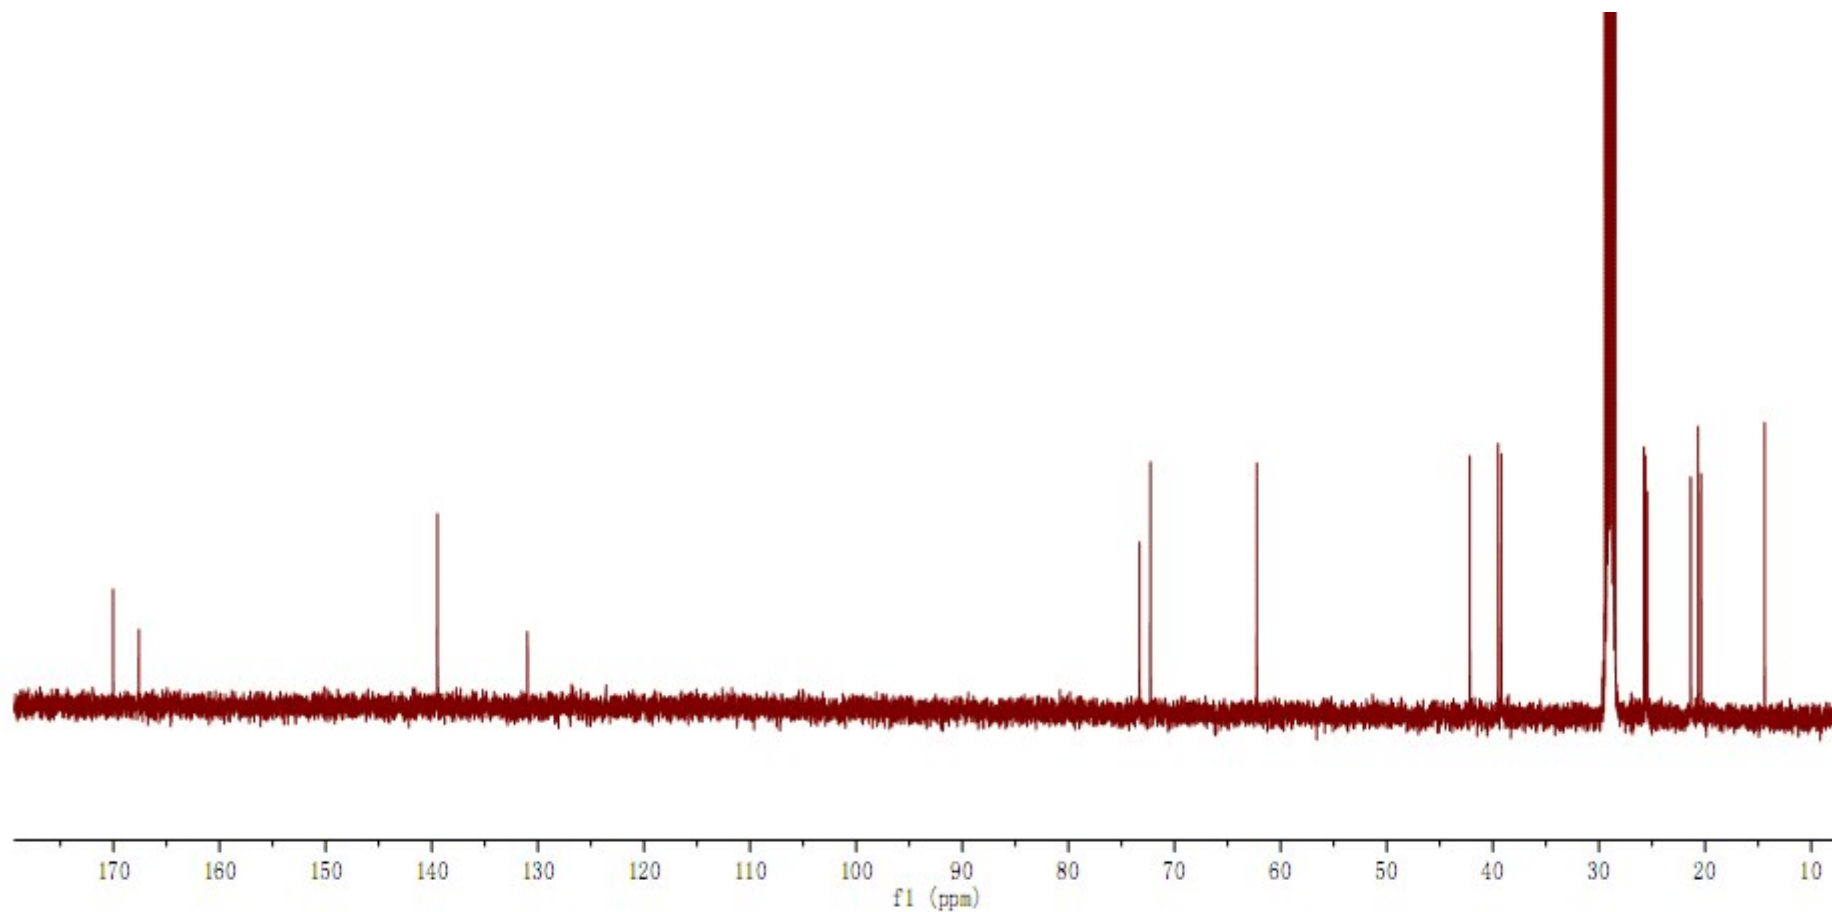

**Figure S8.** HMBC Spectrum of Pholiotin B (**2**; 500 MHz, Acetone- $d_6$ )

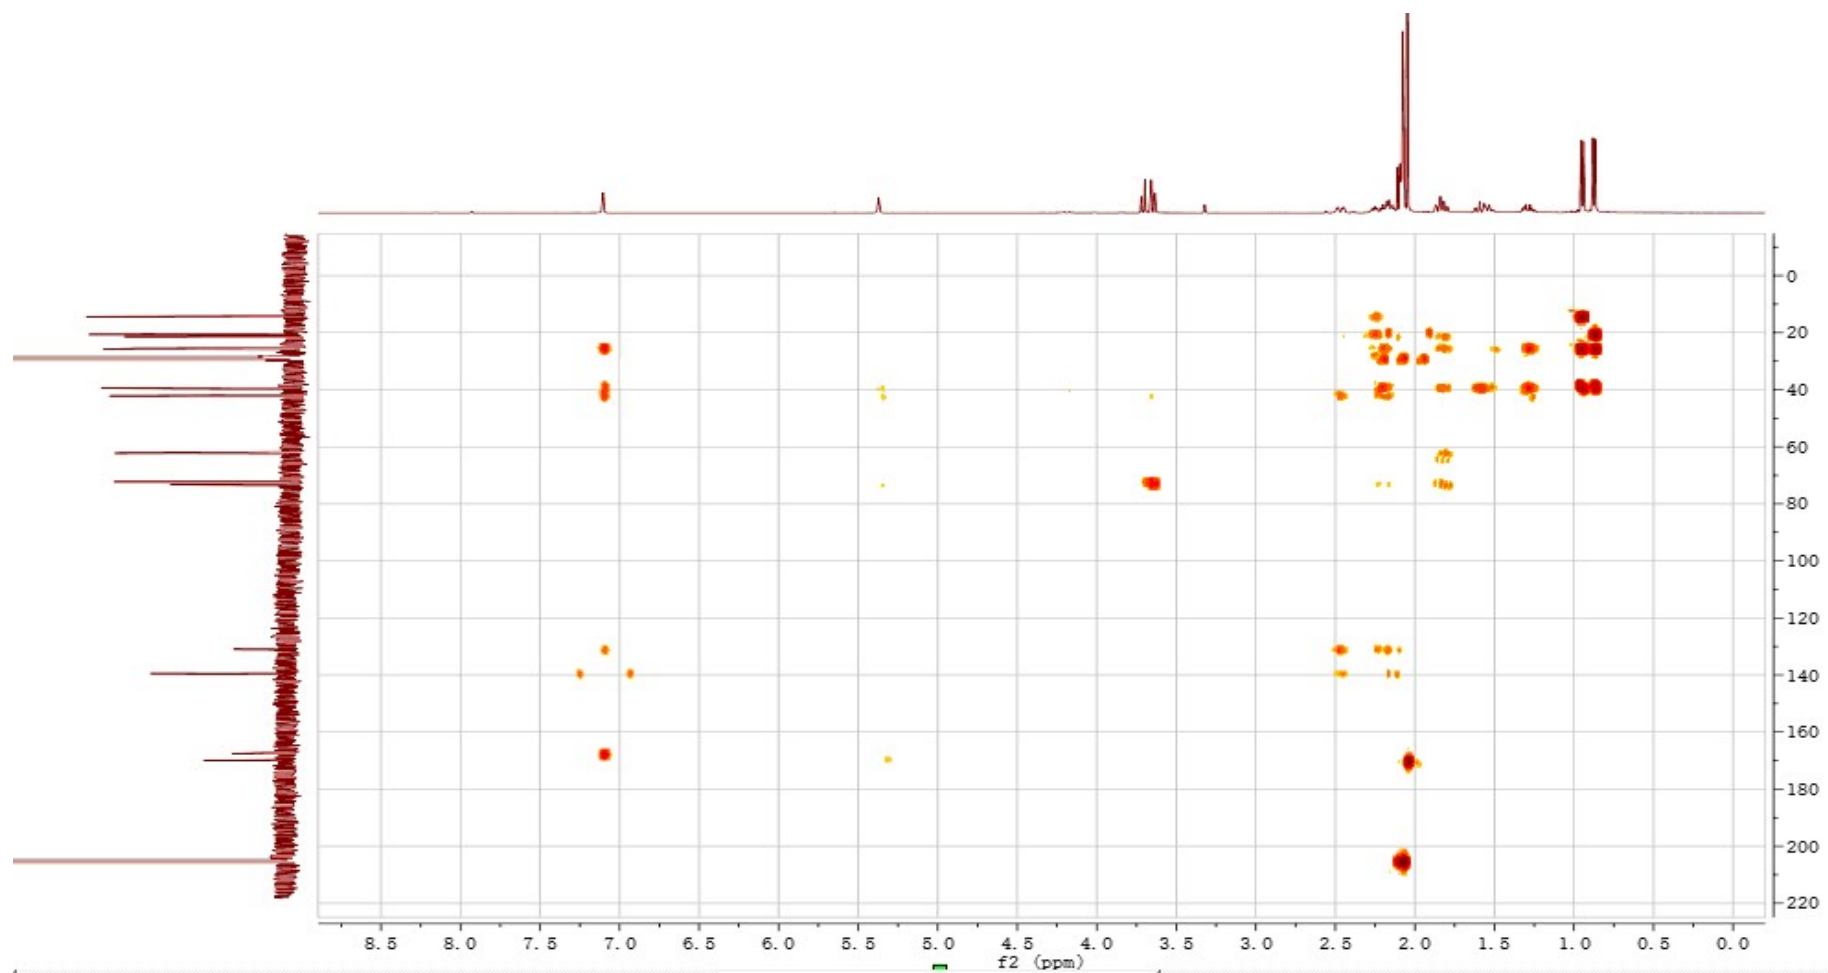

**Figure S9.**  $^1\text{H}$  NMR Spectrum of Pholiotin C (**3**; 500 MHz, Acetone- $d_6$ )

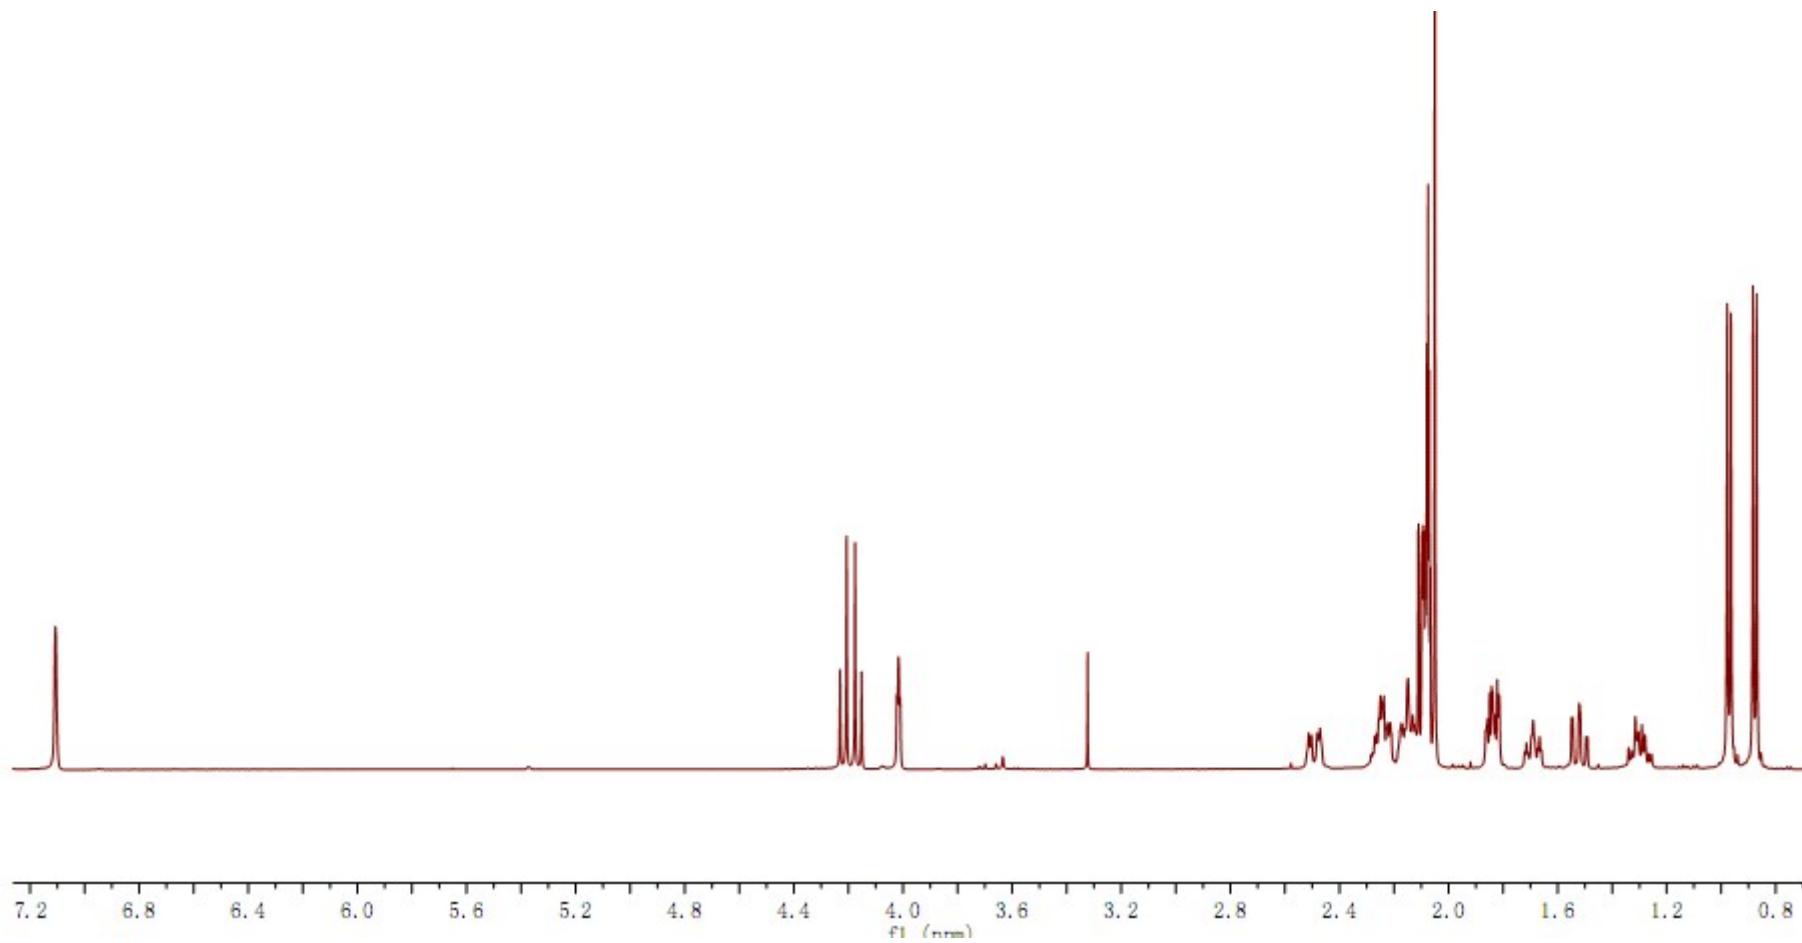

**Figure S10.**  $^{13}\text{C}$  NMR Spectrum of Pholiotin C (**3**, 125 MHz, Acetone- $d_6$ )

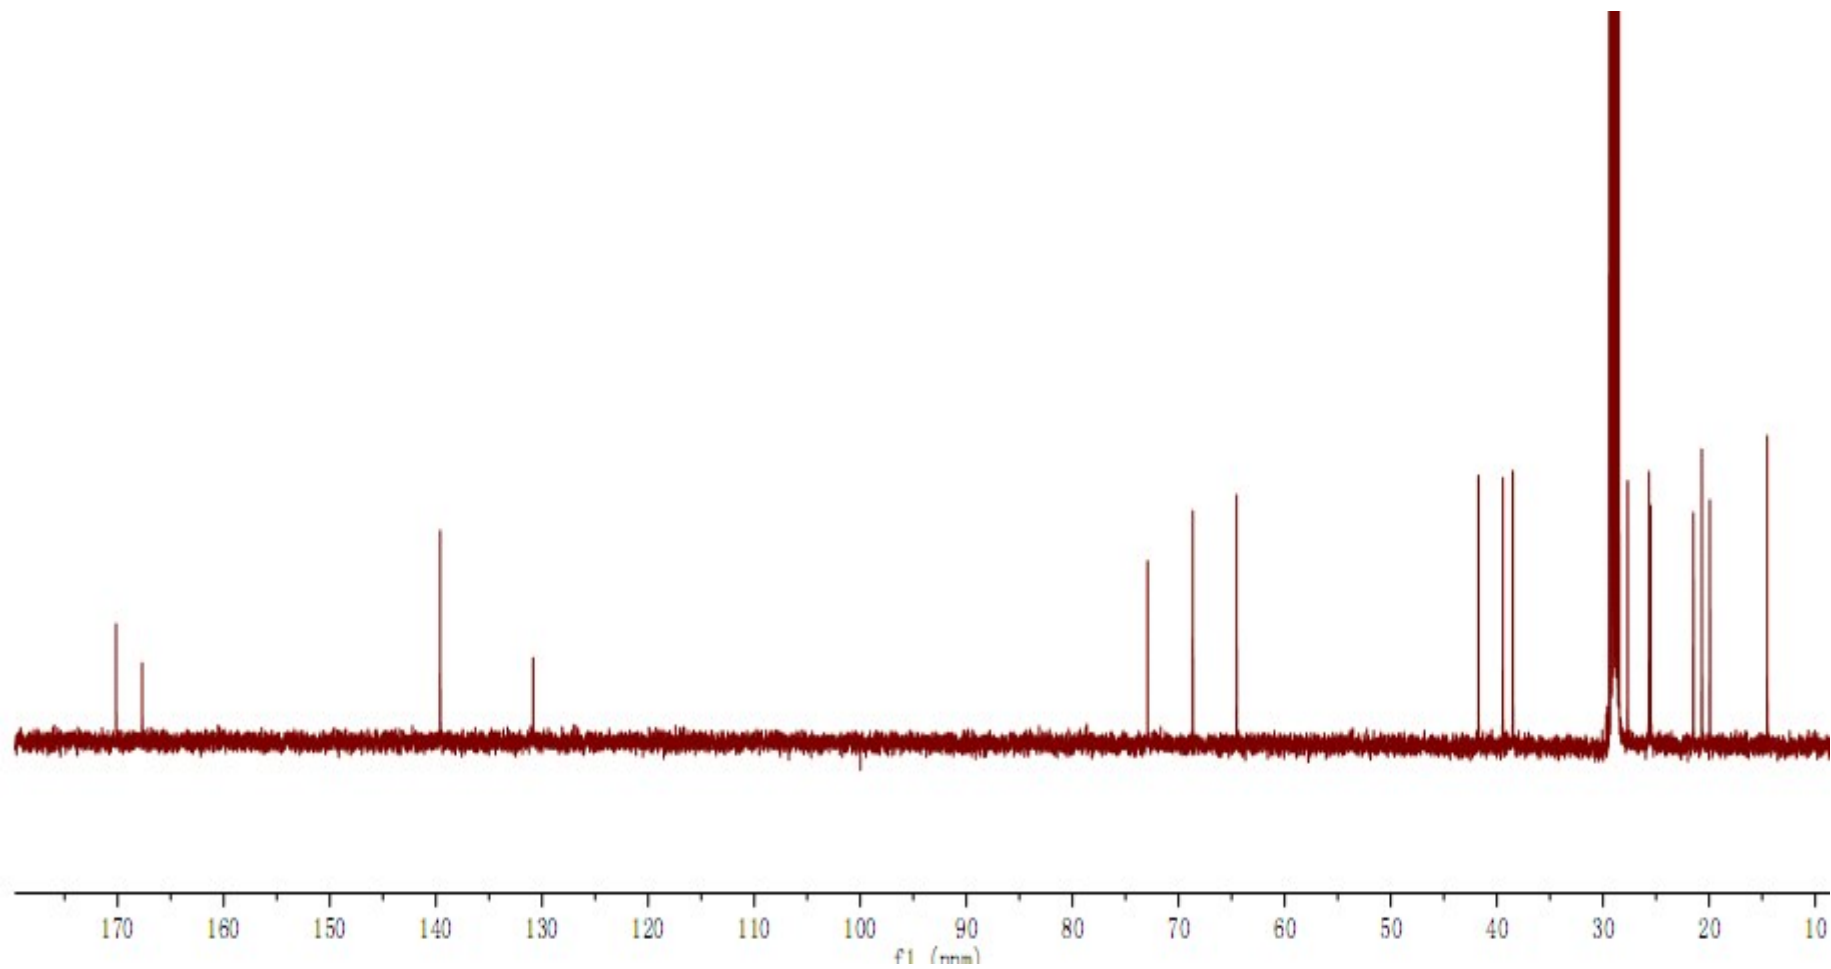

**Figure S11.** HMBC Spectrum of Pholiotin C (**3**; 500 MHz, Acetone- $d_6$ )

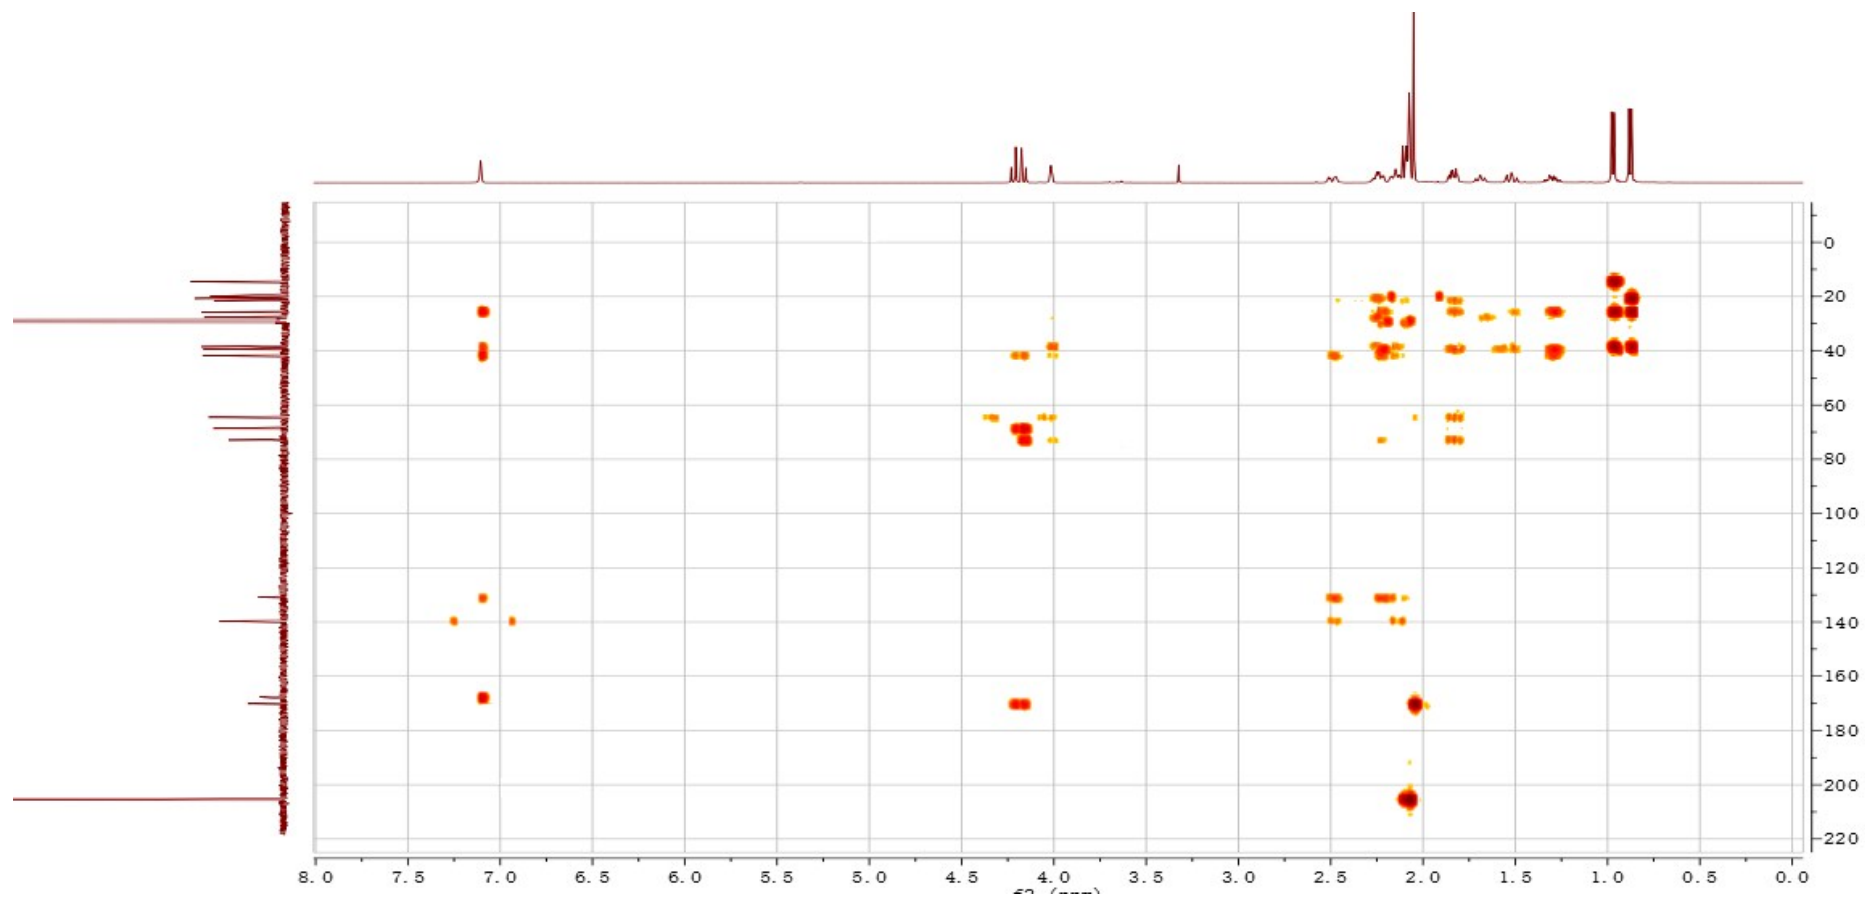

**Figure S12.**  $^1\text{H}$  NMR Spectrum of Pholiotin D (**4**, 500 MHz, Acetone- $d_6$ )

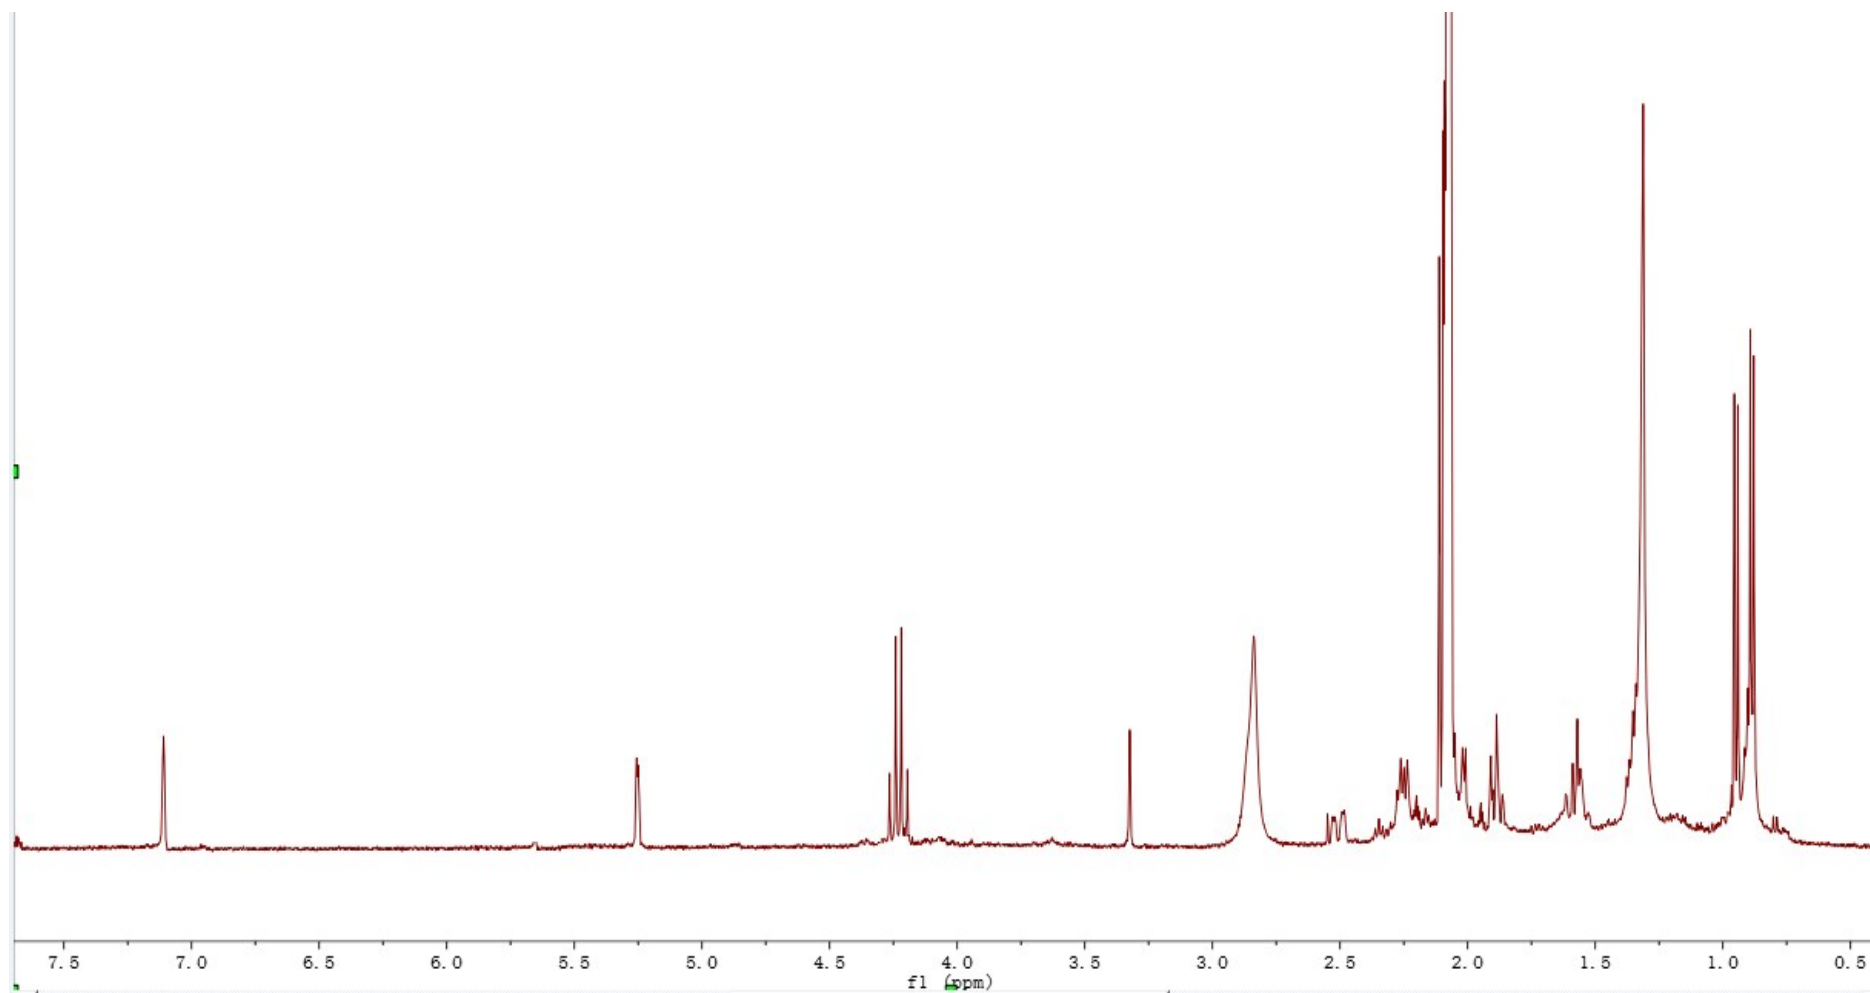

**Figure S13.**  $^{13}\text{C}$  NMR Spectrum of Pholiotin D (**4**, 125 MHz, Acetone- $d_6$ )

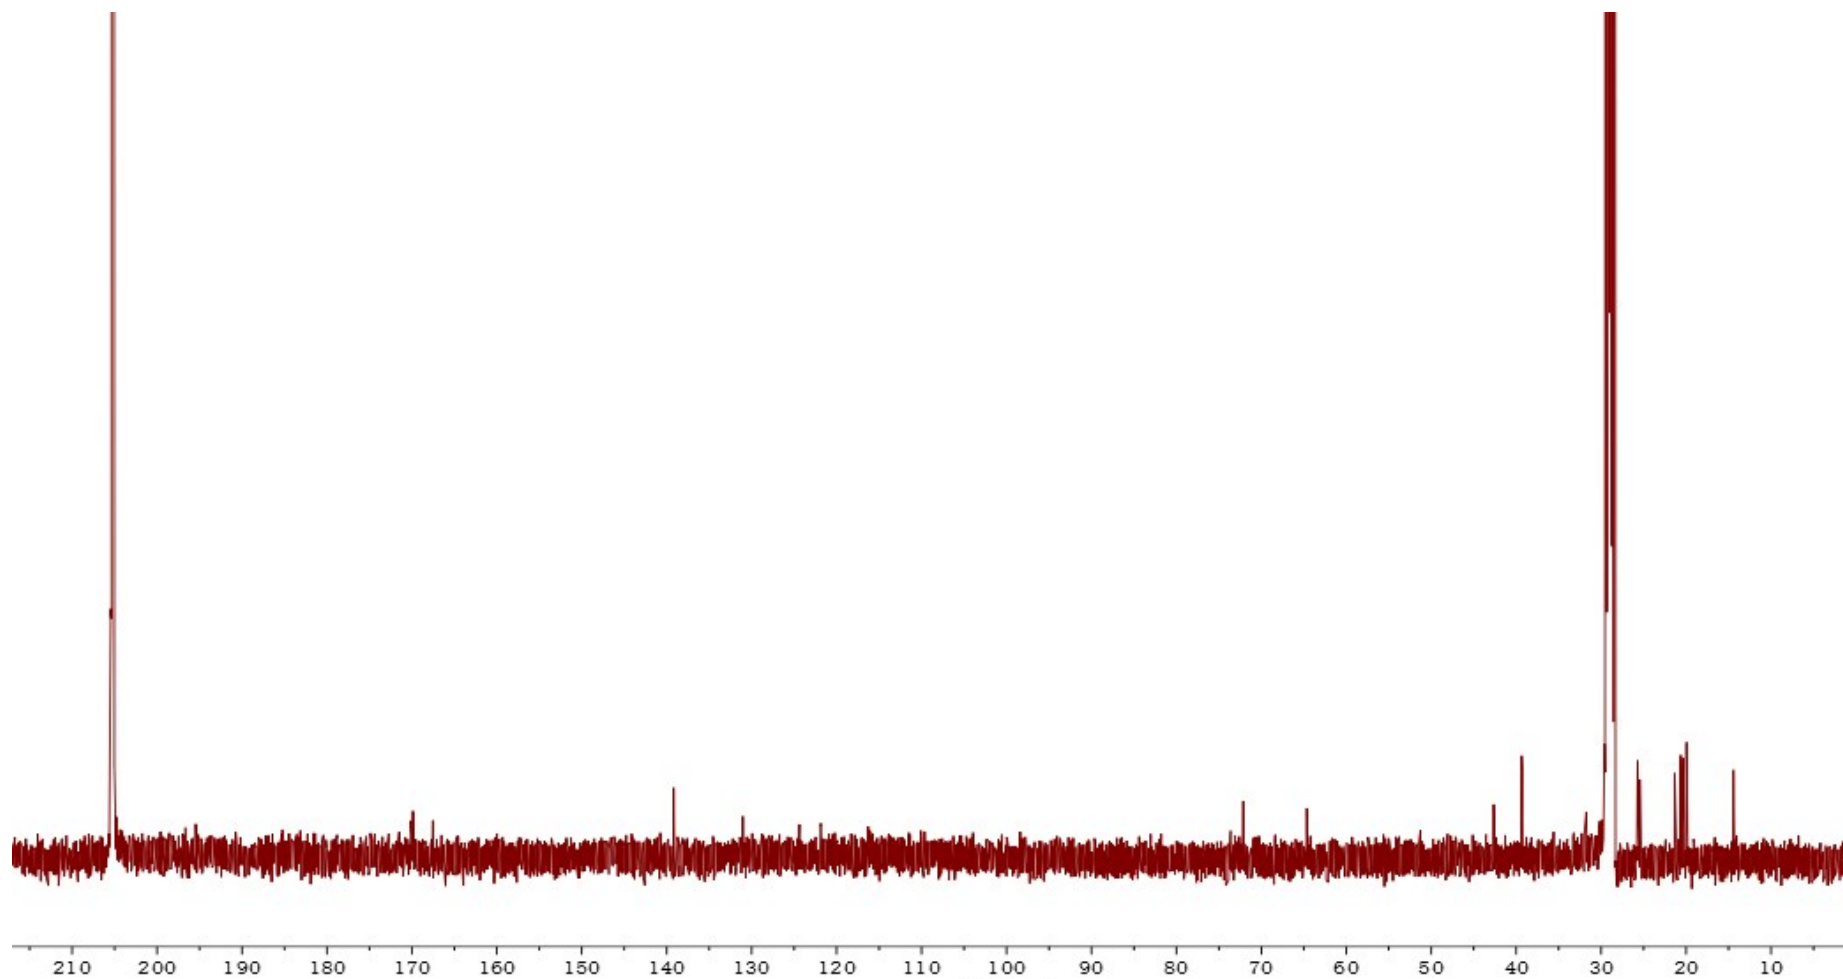

**Figure S14.** HSQC Spectrum of Pholiotin D (**4**; 500 MHz, Acetone- $d_6$ )

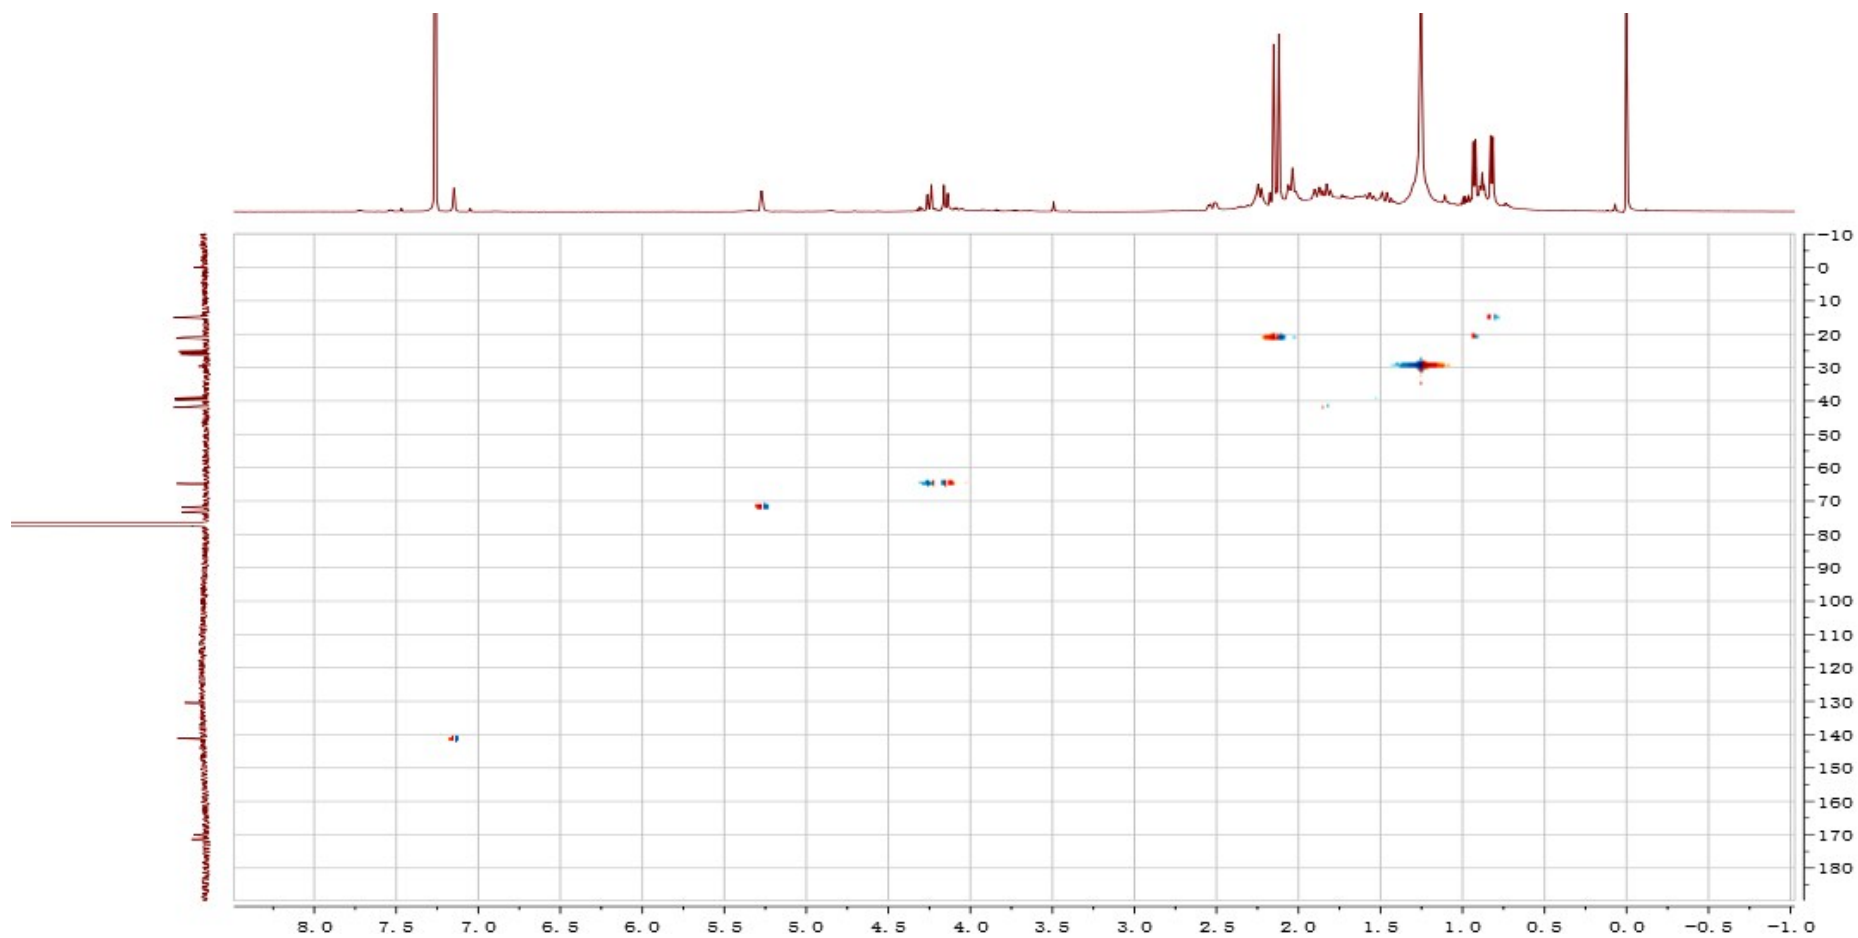



**Figure S15.** HMBC Spectrum of Pholiotin D (4, 500 MHz,  $\text{CDCl}_3$ )

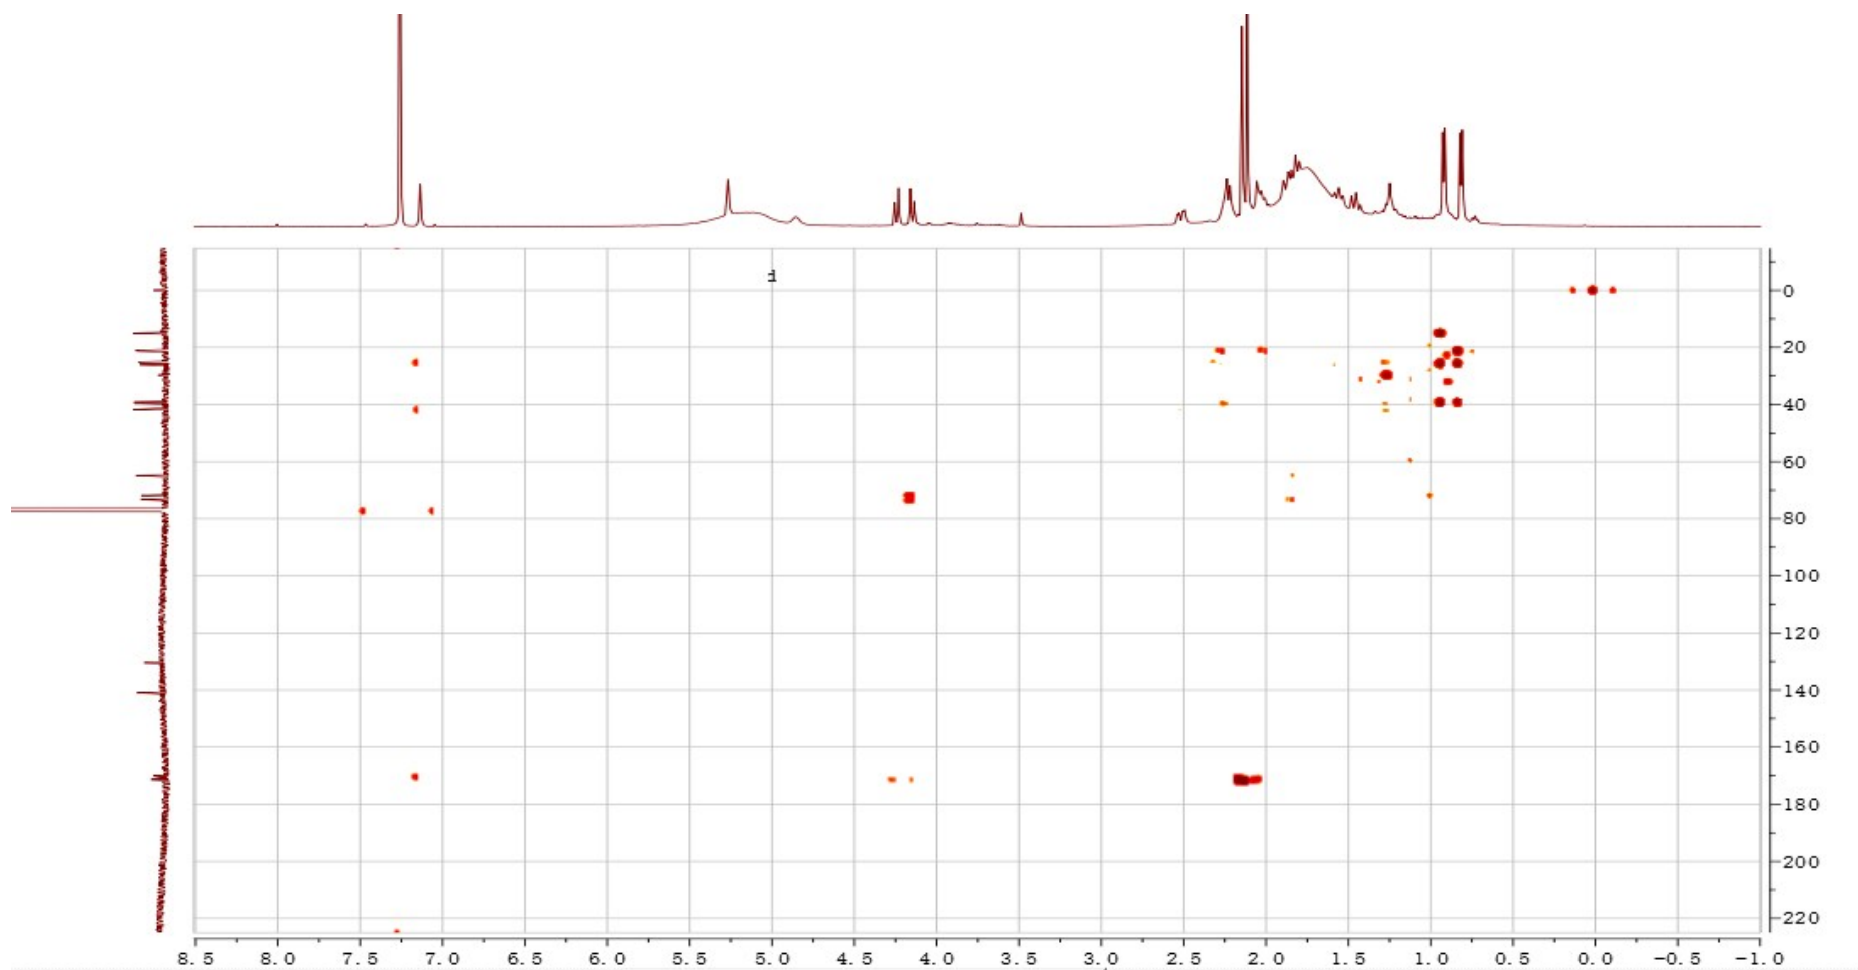

**Figure S16.**  $^1\text{H}$  NMR Spectrum of Pholiotin E (**5**; 500 MHz, Acetone- $d_6$ )

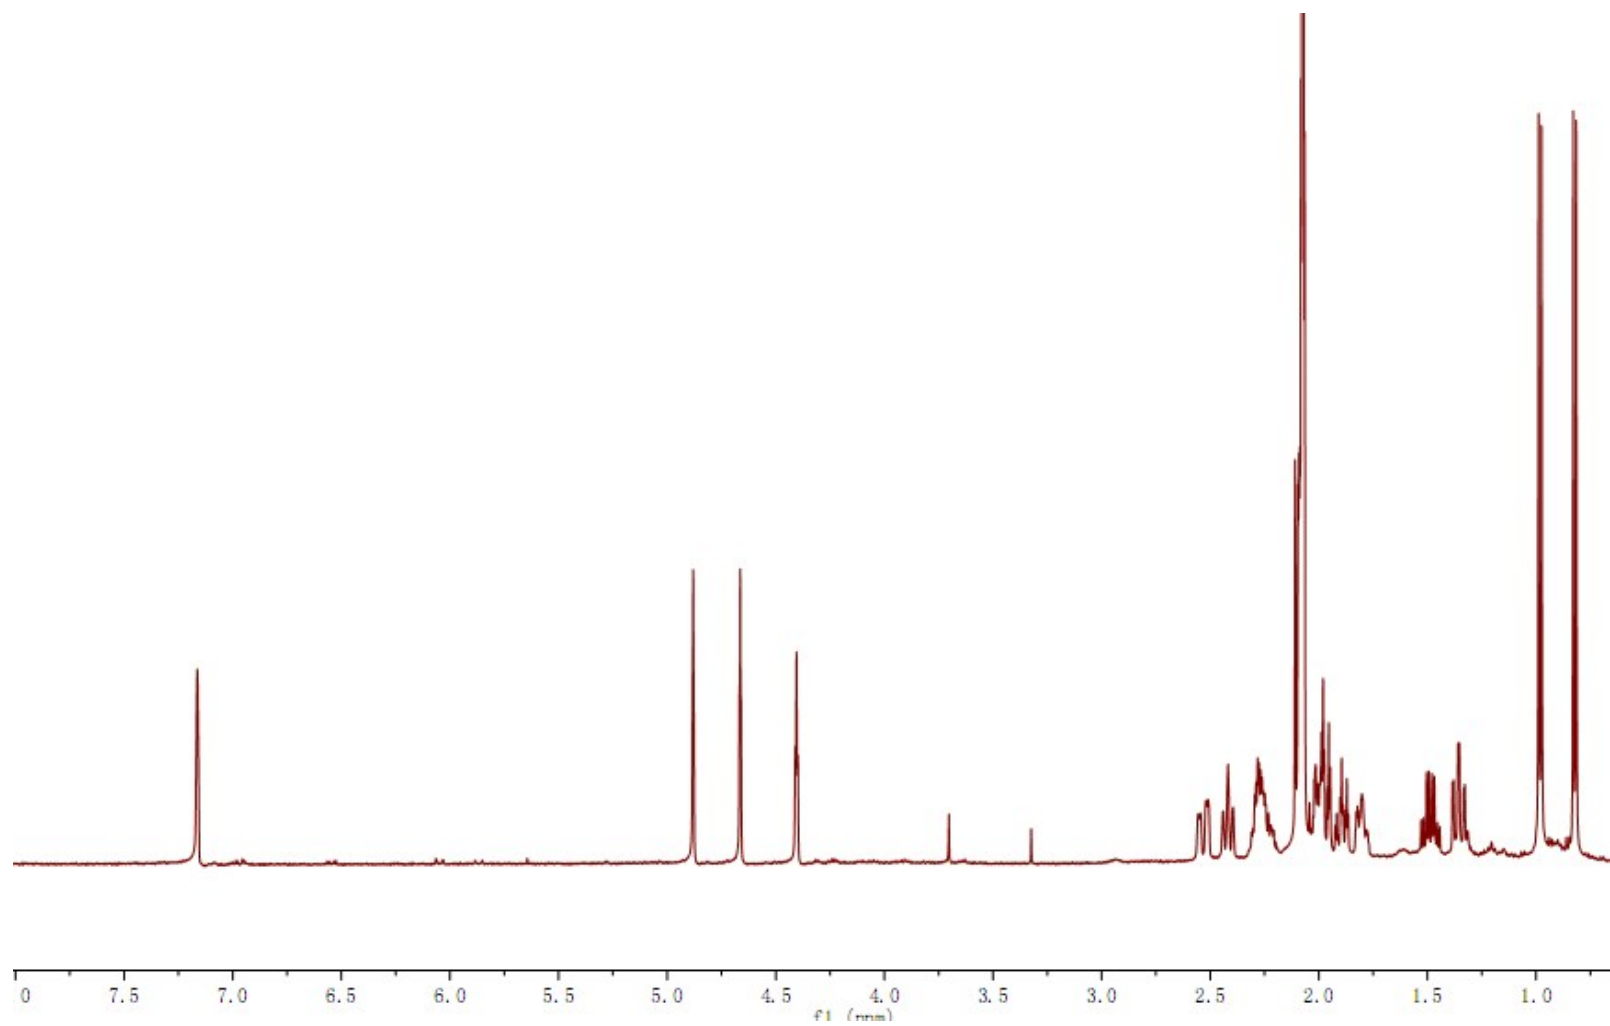

**Figure S17.**  $^{13}\text{C}$  NMR Spectrum of Pholiotin E (**5**; 125 MHz, Acetone- $d_6$ )

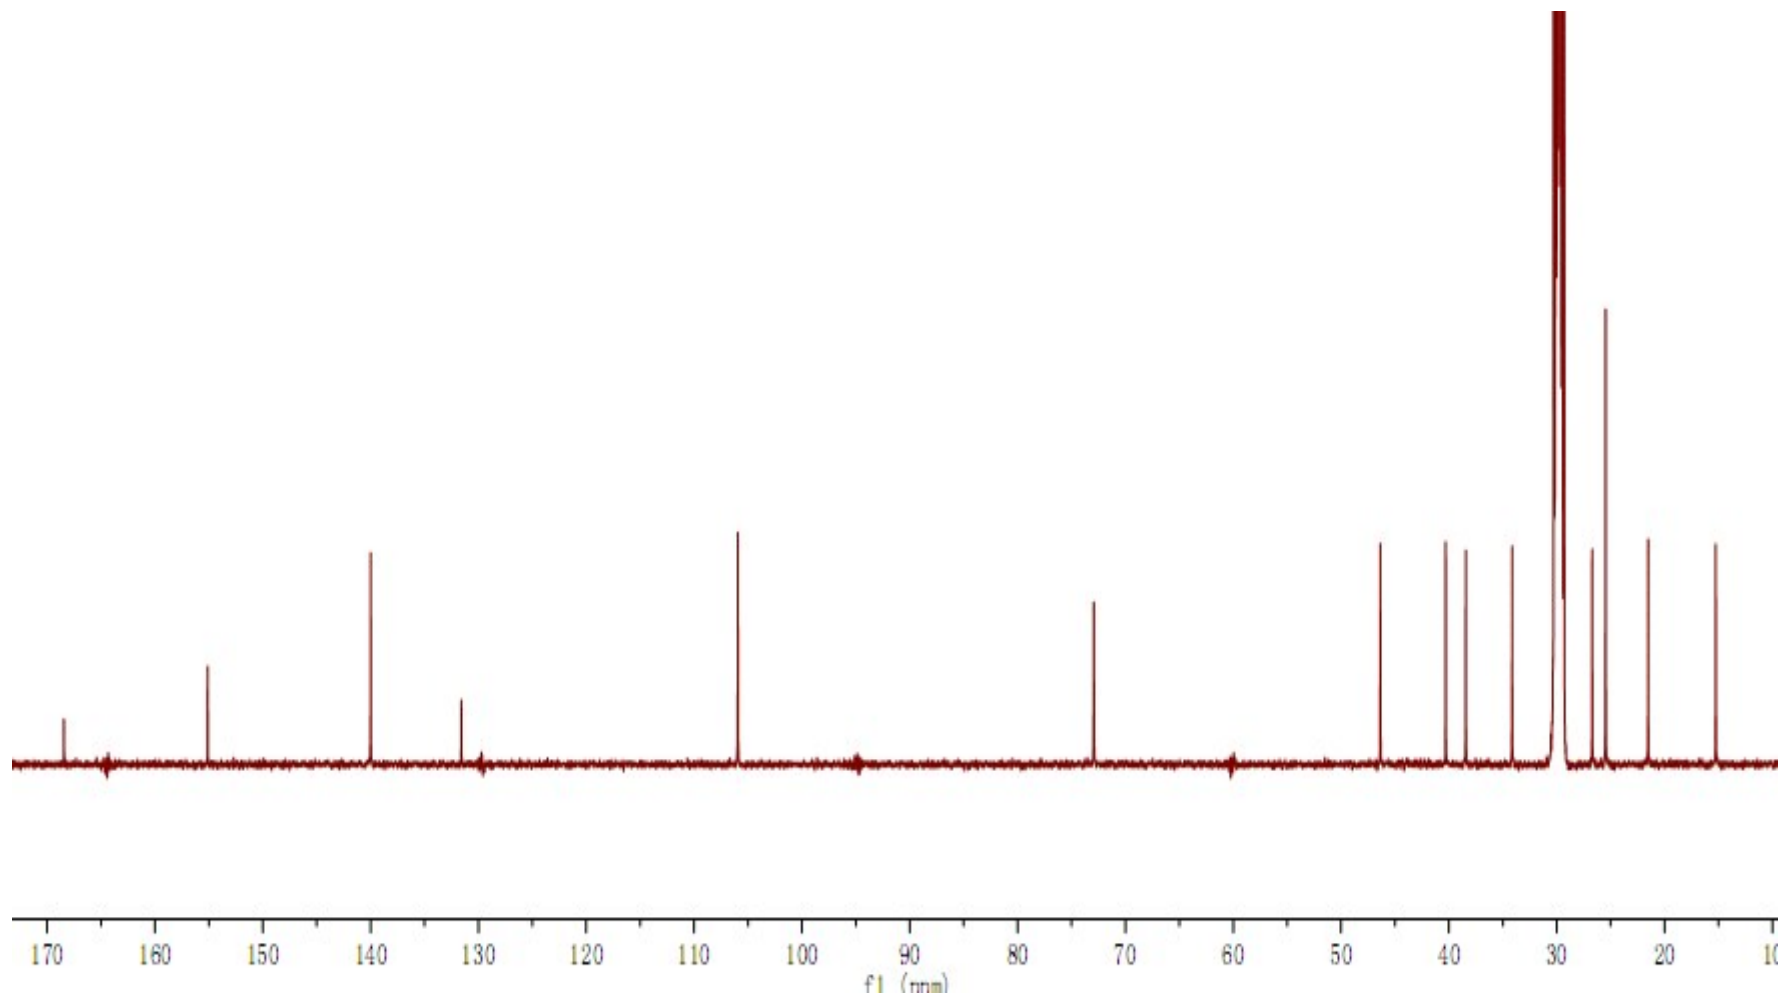

**Figure S18.** HMBC Spectrum of Pholiotin E (**5**; 500 MHz, Acetone- $d_6$ )

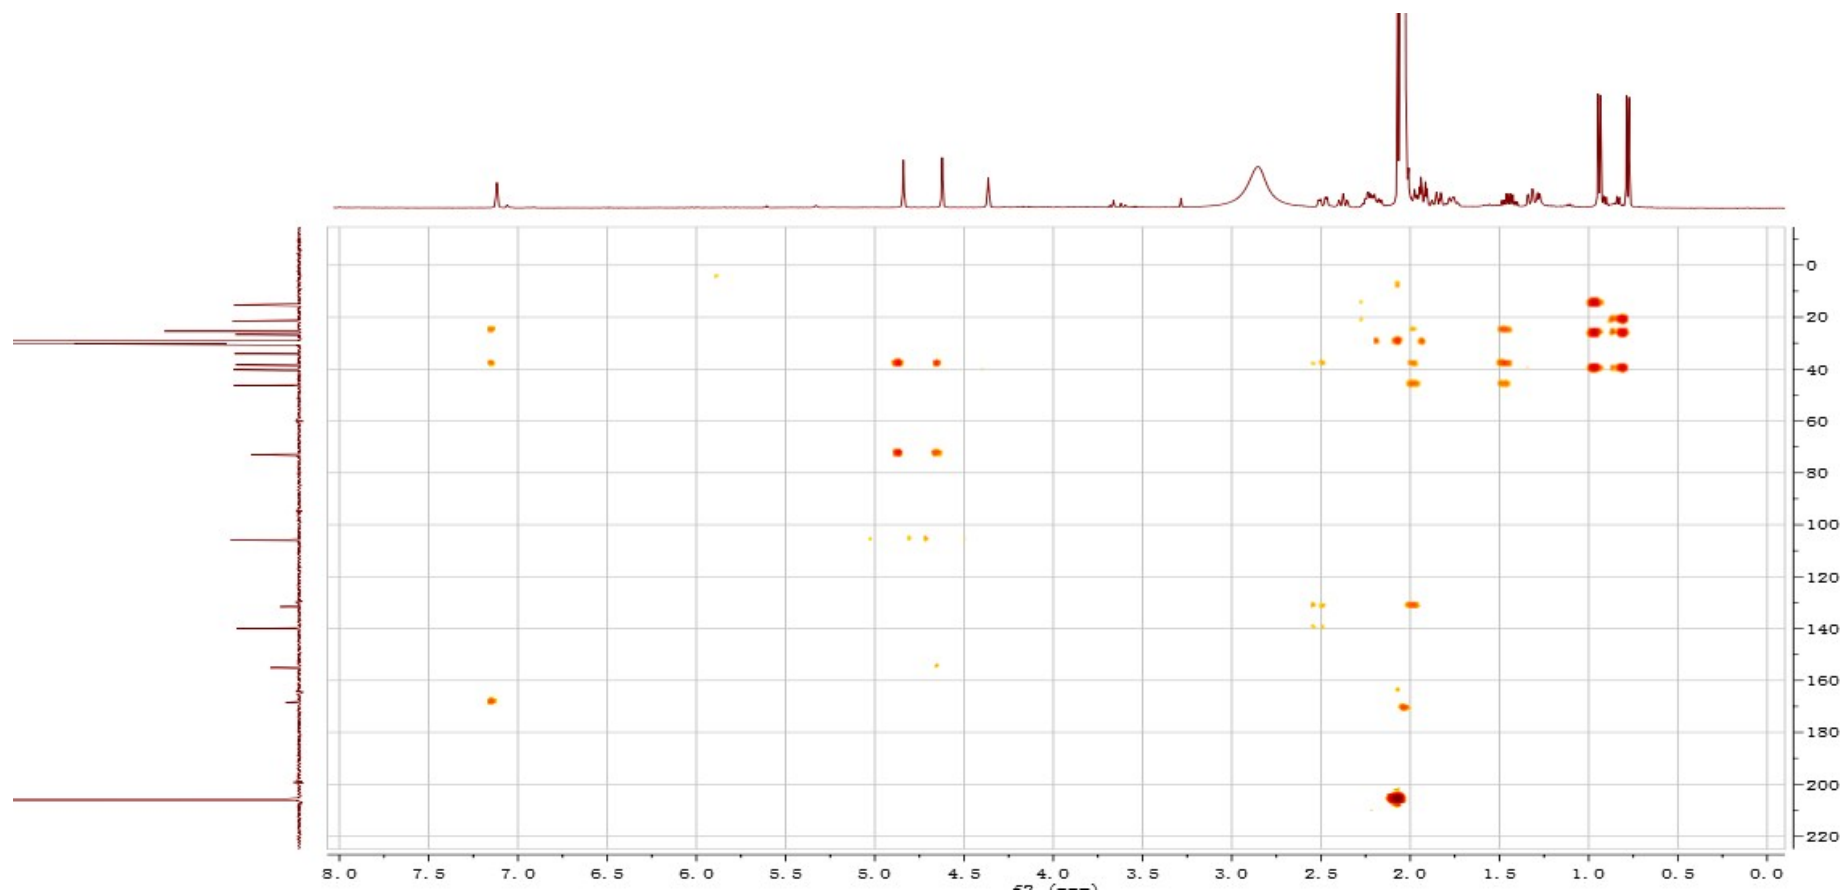

**Figure S19.**  $^1\text{H}$  NMR Spectrum of *R*-MTPA Ester Derivative (**1a** ; 500 MHz,  $\text{CD}_3\text{OD}$ )

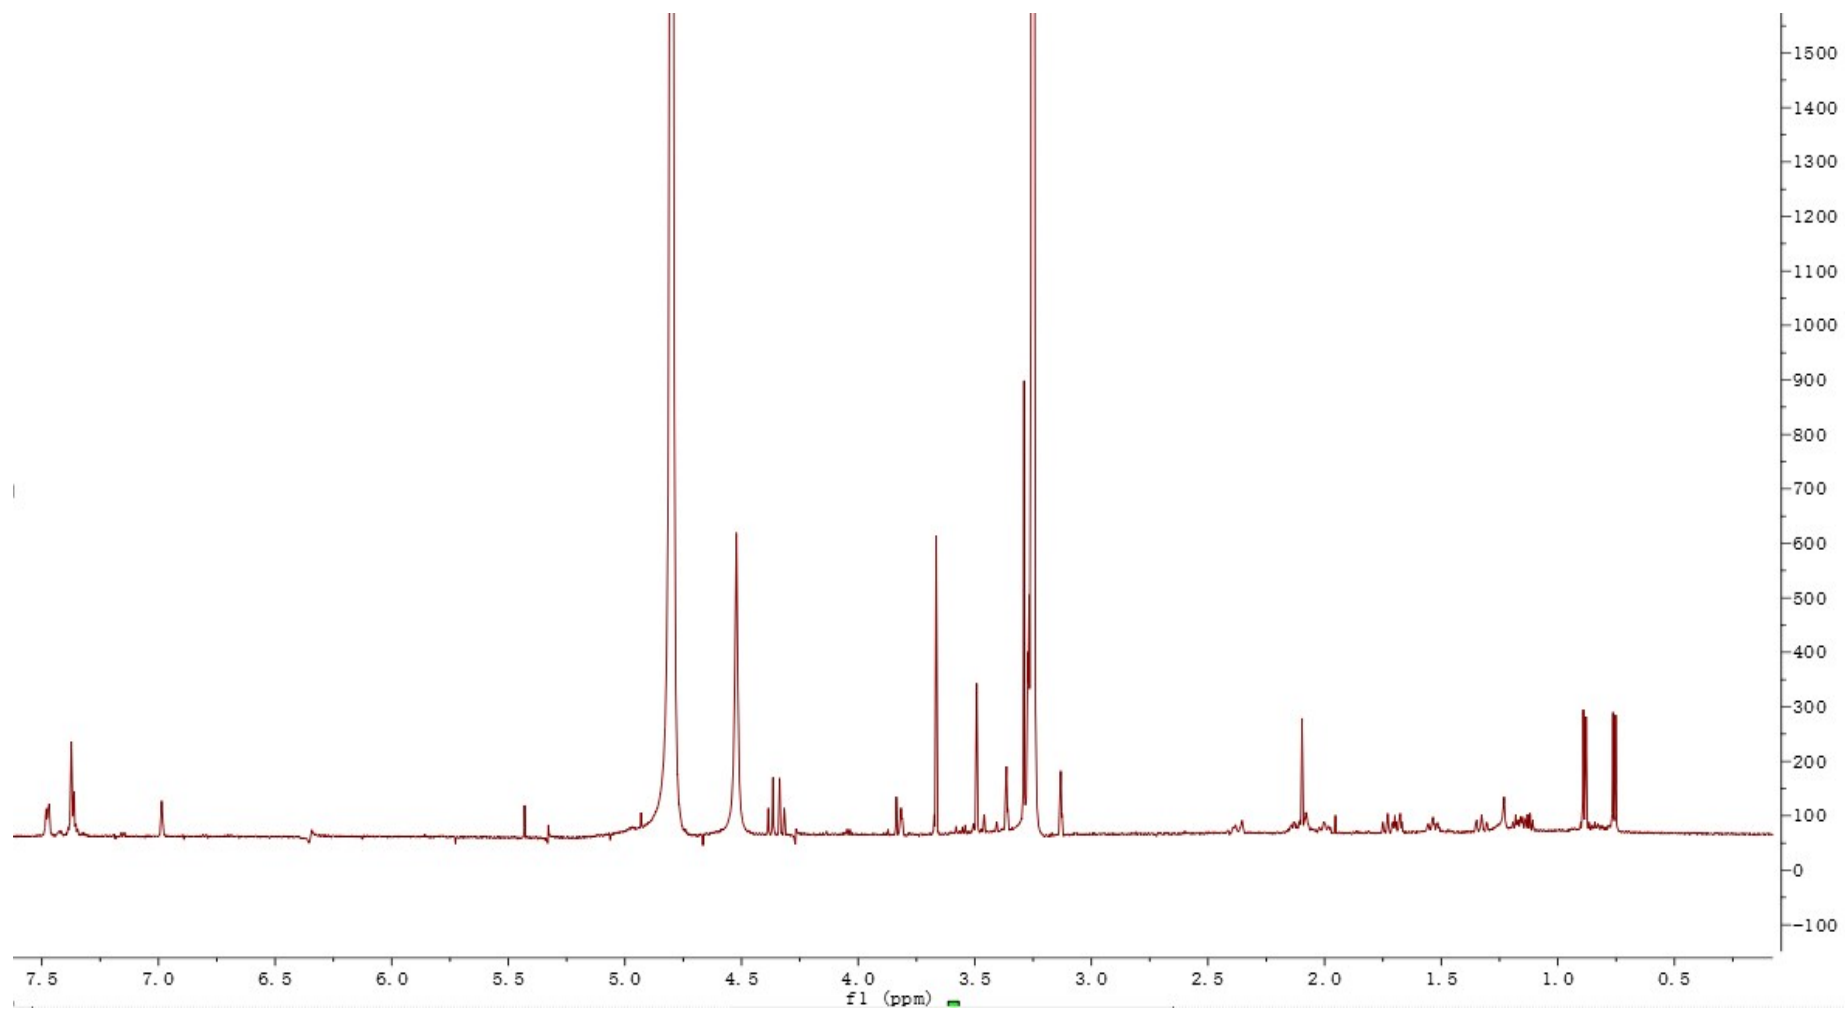

**Figure S20.** CD Spectrum of Pholiotin A (1) in MeOH

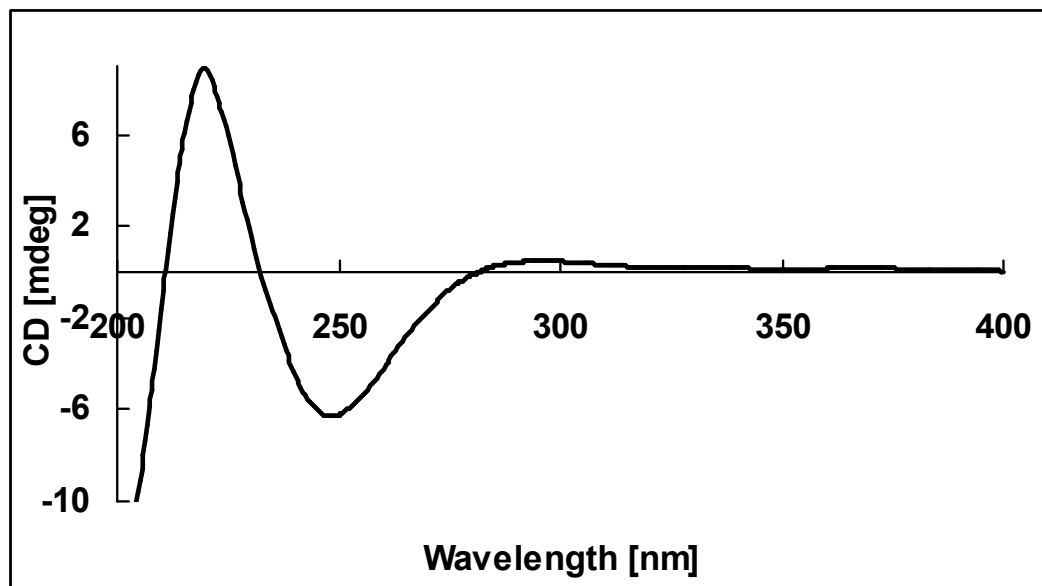

**Figure S21.** CD Spectrum of Pholiotin B (2) in MeOH

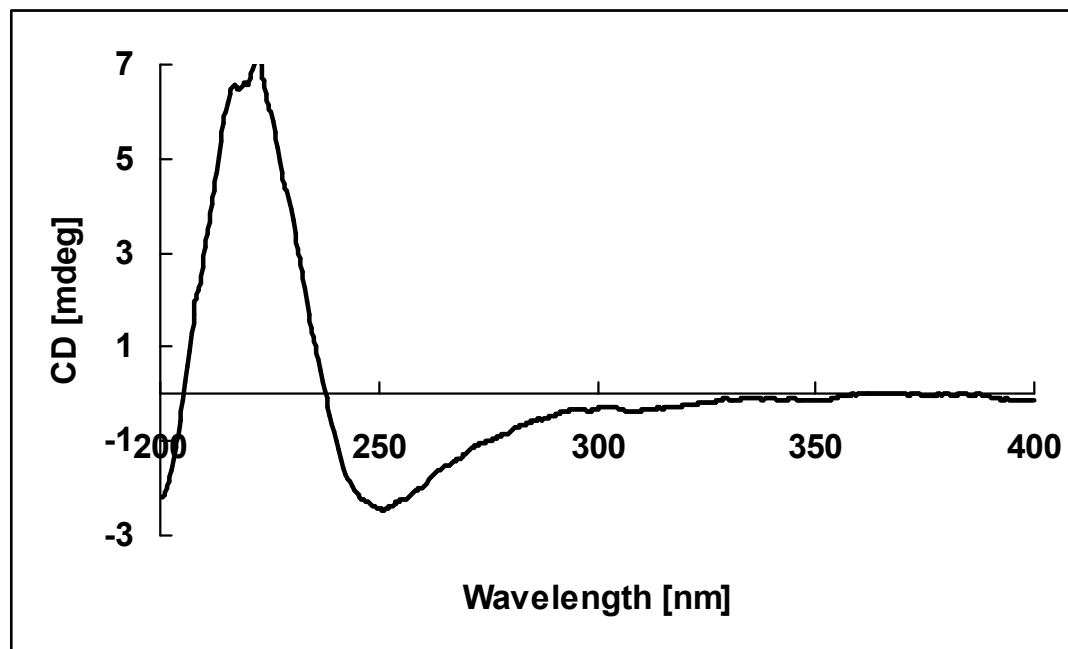

**Figure S22.** CD Spectrum of Pholiotin C (**3**) in MeOH

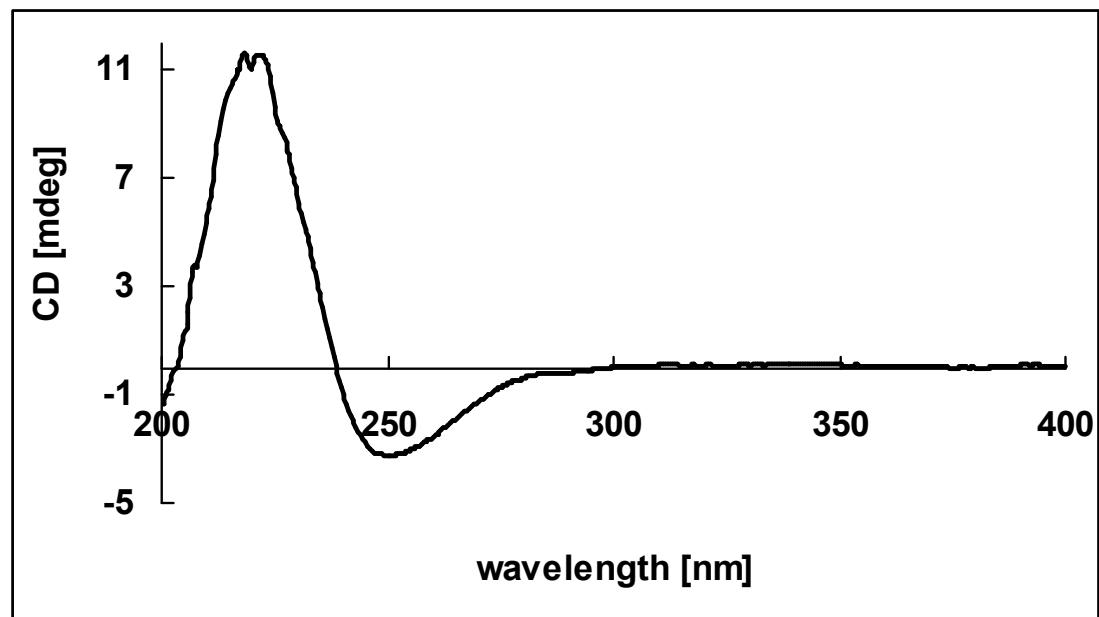



**Figure S23.** CD Spectrum of Pholiotin D (4) in MeOH

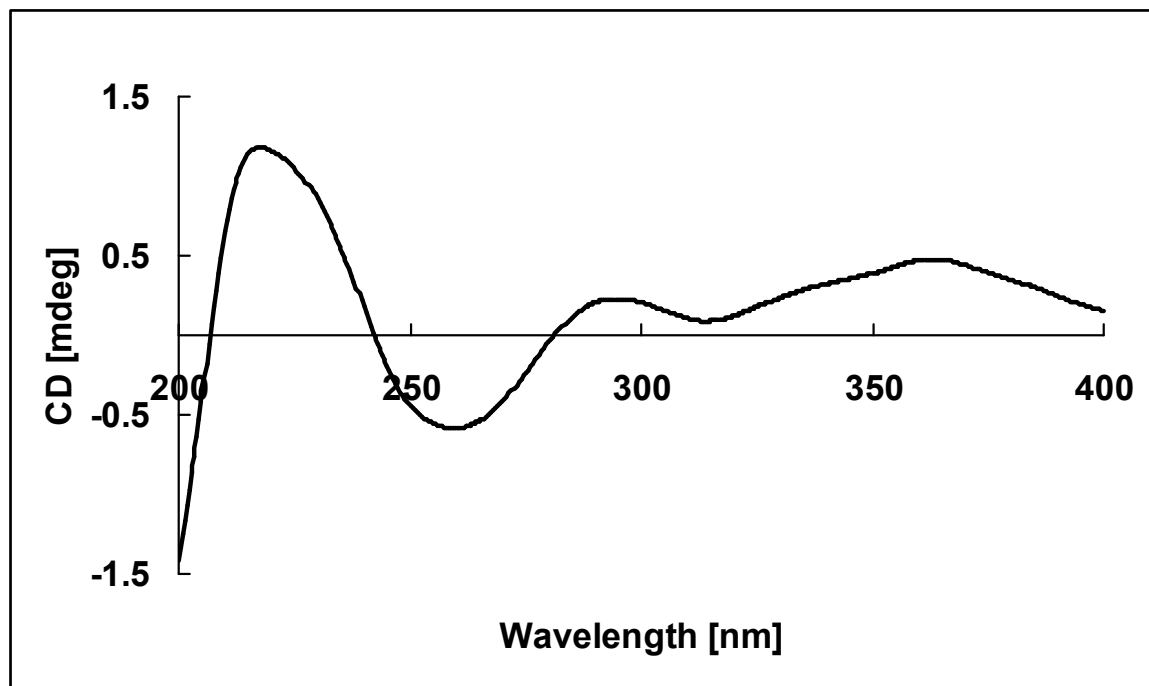

**Figure S24.** CD Spectrum of Pholiotin E (5) in MeOH

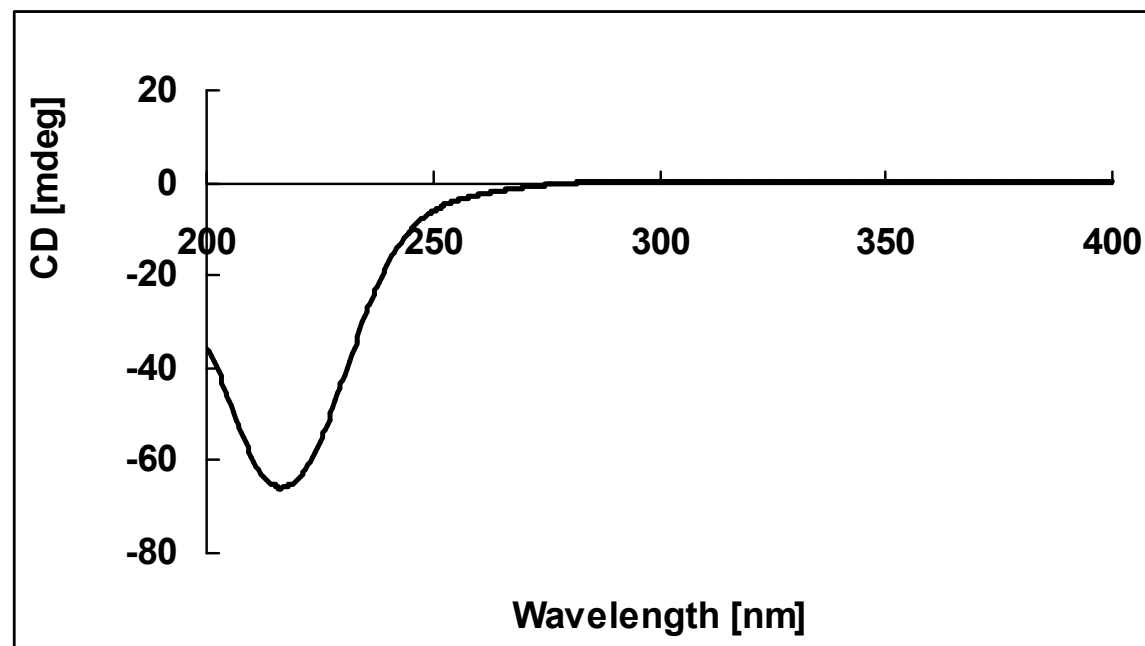

**Figure S25.** The Optimized Conformers for **1c**

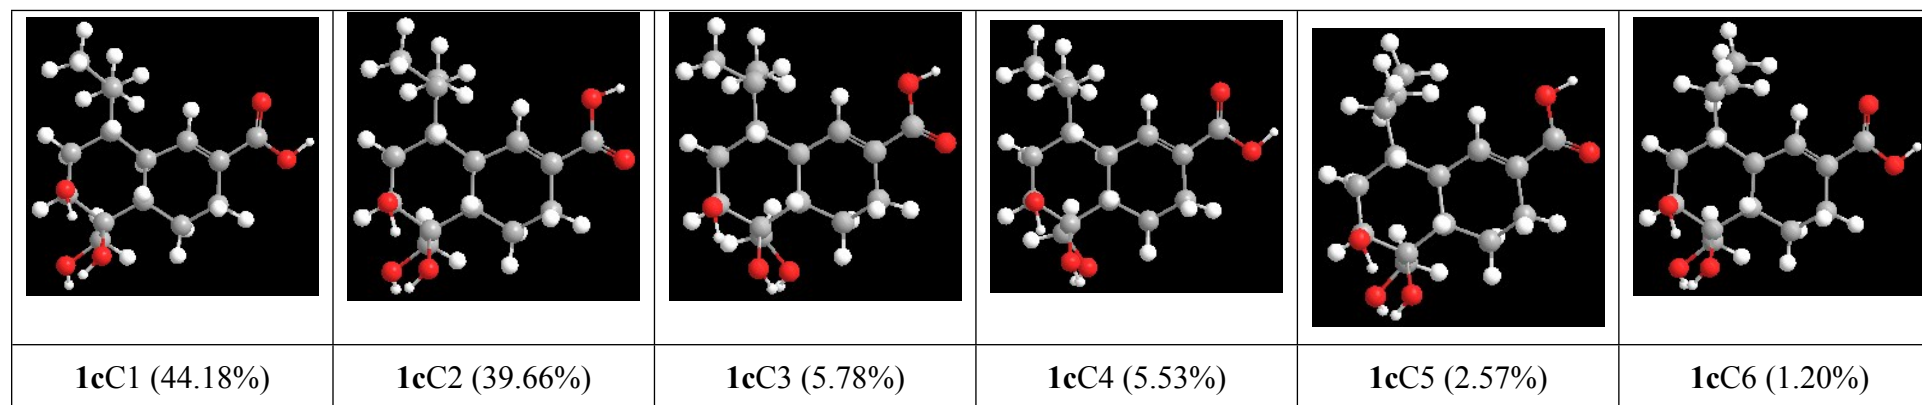

**Figure S26.** The Optimized Conformers for **5a**

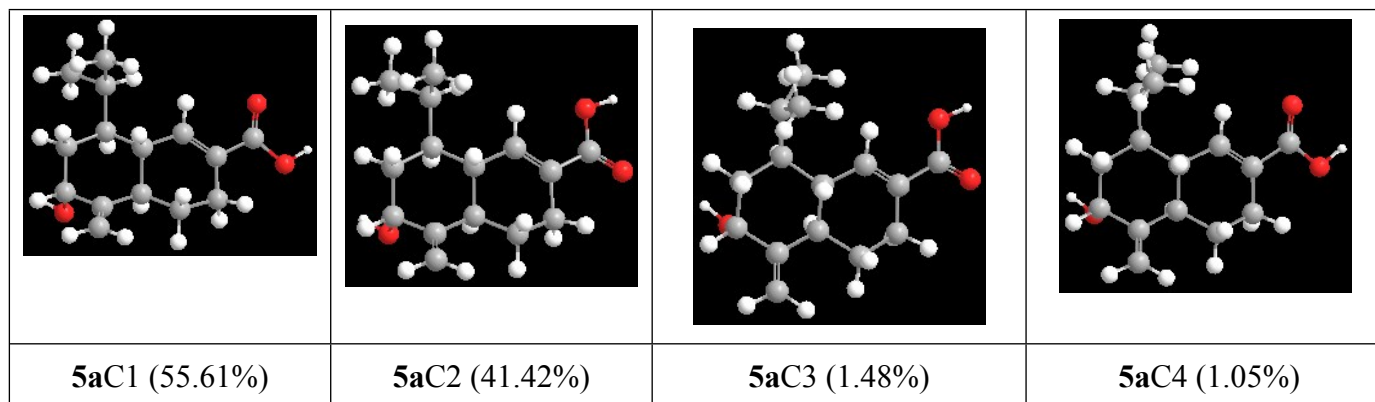

Supplement: c6ra22448b1.pdf [file c6ra22448b1.pdf]
